# Supplementary material for: Efficacy of cannabinoids in neurodevelopmental and neuropsychiatric disorders among children and adolescents: a systematic review
Source: Springer Nature journal article supplement (doi:10.1007/s00787-023-02169-w), 2023-03-03
Supplement: MOESM1 [file 787_2023_2169_MOESM1_ESM.pdf]

## Supplementary Material 1

Article: Efficacy of cannabinoids in neurodevelopmental and neuropsychiatric disorders among children and adolescents: a systematic review

Journal: European Child & Adolescent Psychiatry

Authors: Lauren J. Rice<sup>1,2</sup>, Lisa Cannon<sup>1,3</sup>, Navin Dadlani<sup>4</sup>, Melissa Cheung<sup>1,2</sup>, Stewart L. Einfeld<sup>4</sup>, Daryl Efron<sup>5,6</sup>, David R. Dossetor<sup>2</sup>, Elizabeth J. Elliott<sup>1,2</sup>

1. The University of Sydney, Faculty of Medicine and Health, Specialty of Child and Adolescent Health, Sydney, New South Wales, Australia
2. Sydney Children's Hospitals Network, Kids Research
3. Telethon Kids Institute, Perth Children's Hospital, Perth, Western Australia, Australia
4. The University of Sydney, Faculty of Medicine and Health, Brain and Mind Centre, Sydney, New South Wales, Australia
5. Health Services, Murdoch Children's Research Institute, Department of General Paediatrics, Royal Children's Hospital
6. University of Melbourne, Department of Paediatrics

Correspondence: Lauren Rice, [lauren.rice@sydney.edu.au](mailto:lauren.rice@sydney.edu.au)

### Search strategy for EFFICACY

Search for: limit 21 to (human and yr="1980 -Current" and (preschool child <1 to 6 years> or school child <7 to 12 years> or adolescent <13 to 17 years>))

Results: 1

| Embase Classic+Embase <1947 to 2019 October 04> |                                                                                                                                                                                                     |         |            |
|-------------------------------------------------|-----------------------------------------------------------------------------------------------------------------------------------------------------------------------------------------------------|---------|------------|
| #                                               | Search Statement                                                                                                                                                                                    | Results | Annotation |
| 1                                               | exp cannabinoid/                                                                                                                                                                                    | 66067   |            |
| 2                                               | (cannabi* or hemp* or marijuana* or nabilone or thc* or sativex or dronabinol or Nabiximol* or epidiolex or Levonantradol or Ajulemic acid or ECP002A or tetrahydrocannabinol).mp.                  | 89434   |            |
| 3                                               | 1 or 2                                                                                                                                                                                              | 94006   |            |
| 4                                               | exp psychosis/                                                                                                                                                                                      | 302918  |            |
| 5                                               | attention deficit disorder/                                                                                                                                                                         | 58411   |            |
| 6                                               | tic/                                                                                                                                                                                                | 9545    |            |
| 7                                               | Gilles de la Tourette syndrome/                                                                                                                                                                     | 8013    |            |
| 8                                               | intellectual impairment/                                                                                                                                                                            | 25752   |            |
| 9                                               | fragile X syndrome/                                                                                                                                                                                 | 8314    |            |
| 10                                              | exp autism/                                                                                                                                                                                         | 66143   |            |
| 11                                              | posttraumatic stress disorder/                                                                                                                                                                      | 57130   |            |
| 12                                              | exp anxiety disorder/                                                                                                                                                                               | 235210  |            |
| 13                                              | major depression/                                                                                                                                                                                   | 61354   |            |
| 14                                              | exp bipolar disorder/                                                                                                                                                                               | 63127   |            |
| 15                                              | fetal alcohol syndrome/                                                                                                                                                                             | 6604    |            |
| 16                                              | (psychosis or psychoses or psychotic or schizophreni* or adhd or attention deficit disorder*).mp.                                                                                                   | 366094  |            |
| 17                                              | (tics or tourette* or intellectual development disorder* or intellectual disabilit* or fragile x).mp.                                                                                               | 46441   |            |
| 18                                              | (autism or autistic or Child Behavior?r Disorder* or pervasive development disorder or major depression or f?etal alcohol or post traumatic stress disorder* or posttraumatic stress disorder*).mp. | 209585  |            |
| 19                                              | (anxiety disorder* or severe behavio?ral disturbance* or challenging behavio?r).mp.                                                                                                                 | 92879   |            |
| 20                                              | 4 or 5 or 6 or 7 or 8 or 9 or 10 or 11 or 12 or 13 or 14 or 15 or 16 or 17 or 18 or 19                                                                                                              | 786493  |            |
| 21                                              | 3 and 20                                                                                                                                                                                            | 13366   |            |
| 22                                              | limit 21 to (human and yr="1980 -Current" and (preschool child <1 to 6 years> or school child <7 to 12 years> or adolescent <13 to 17 years>))                                                      | 1907    |            |

[Execute Searches in Ovid](#)

Search for: limit 24 to (humans and yr="1980 -Current" and "all child (0 to 18 years)")

Results: 1

| Ovid MEDLINE(R) ALL <1946 to October 04, 2019> |                                                                                                                                                                                                  |         |            |
|------------------------------------------------|--------------------------------------------------------------------------------------------------------------------------------------------------------------------------------------------------|---------|------------|
| #                                              | Search Statement                                                                                                                                                                                 | Results | Annotation |
| 1                                              | exp Cannabinoids/                                                                                                                                                                                | 13338   |            |
| 2                                              | Cannabis/                                                                                                                                                                                        | 8635    |            |
| 3                                              | (cannabi* or hemp* or marijuana* or nabilone or thc* or sativex or dronabinol or Nabiximol* or epidiolex or Levonantradol or Ajulemic acid or ECP002A or tetrahydrocannabinol).mp.               | 54594   |            |
| 4                                              | 1 or 2 or 3                                                                                                                                                                                      | 54594   |            |
| 5                                              | psychotic disorders/ or psychoses, substance-induced/                                                                                                                                            | 48917   |            |
| 6                                              | exp Schizophrenia/                                                                                                                                                                               | 102001  |            |
| 7                                              | exp "Attention Deficit and Disruptive Behavior Disorders"/                                                                                                                                       | 31325   |            |
| 8                                              | Tics/                                                                                                                                                                                            | 866     |            |
| 9                                              | Tourette Syndrome/                                                                                                                                                                               | 4203    |            |
| 10                                             | exp Intellectual Disability/                                                                                                                                                                     | 93687   |            |
| 11                                             | Fragile X Syndrome/                                                                                                                                                                              | 4877    |            |
| 12                                             | exp Child Development Disorders, Pervasive/                                                                                                                                                      | 32767   |            |
| 13                                             | bipolar disorder/                                                                                                                                                                                | 39203   |            |
| 14                                             | Child Behavior Disorders/                                                                                                                                                                        | 20021   |            |
| 15                                             | Depressive Disorder, Major/                                                                                                                                                                      | 28535   |            |
| 16                                             | Fetal Alcohol Spectrum Disorders/                                                                                                                                                                | 4056    |            |
| 17                                             | Stress Disorders, Post-Traumatic/                                                                                                                                                                | 30880   |            |
| 18                                             | exp Anxiety Disorders/                                                                                                                                                                           | 77261   |            |
| 19                                             | (psychosis or psychoses or psychotic or schizophre* or adhd or attention deficit disorder*).mp.                                                                                                  | 231289  |            |
| 20                                             | (tics or tourette* or intellectual development disorder* or intellectual disabilit* or fragile x).mp.                                                                                            | 75871   |            |
| 21                                             | (autism or autistic or Child Behavior Disorder* or pervasive development disorder or major depression or fetal alcohol or post traumatic stress disorder* or posttraumatic stress disorder*).mp. | 122140  |            |
| 22                                             | (anxiety disorder* or severe behavioral disturbance* or challenging behavior*).mp.                                                                                                               | 49854   |            |
| 23                                             | 5 or 6 or 7 or 8 or 9 or 10 or 11 or 12 or 13 or 14 or 15 or 16 or 17 or 18 or 19 or 20 or 21 or 22                                                                                              | 560264  |            |
| 24                                             | 4 and 23                                                                                                                                                                                         | 4874    |            |
| 25                                             | limit 24 to (humans and yr="1980 -Current" and "all child (0 to 18 years)")                                                                                                                      | 1534    |            |

[Execute Searches in Ovid](#)

Search for: 24 and 25

Results: 1

| EBM Reviews - Cochrane Central Register of Controlled Trials <August 2019> |                                                                                                                                                                                                  |         |            |
|----------------------------------------------------------------------------|--------------------------------------------------------------------------------------------------------------------------------------------------------------------------------------------------|---------|------------|
| #                                                                          | Search Statement                                                                                                                                                                                 | Results | Annotation |
| 1                                                                          | exp cannabinoids/                                                                                                                                                                                | 731     |            |
| 2                                                                          | cannabis/                                                                                                                                                                                        | 291     |            |
| 3                                                                          | (cannabi* or hemp* or marijuana* or nabilone or thc* or sativex or dronabinol or Nabiximol* or epidiolex or Levonantradol or Ajulemic acid or ECP002A or tetrahydrocannabinol).mp.               | 4554    |            |
| 4                                                                          | 1 or 2 or 3                                                                                                                                                                                      | 4554    |            |
| 5                                                                          | exp "Schizophrenia and Disorders with Psychotic Features"/                                                                                                                                       | 8104    |            |
| 6                                                                          | Tic disorders/                                                                                                                                                                                   | 97      |            |
| 7                                                                          | tics/                                                                                                                                                                                            | 61      |            |
| 8                                                                          | Tourette syndrome/                                                                                                                                                                               | 226     |            |
| 9                                                                          | exp intellectual disability/                                                                                                                                                                     | 1275    |            |
| 10                                                                         | exp Child Development Disorders, Pervasive/                                                                                                                                                      | 1107    |            |
| 11                                                                         | Child behavior disorders/                                                                                                                                                                        | 828     |            |
| 12                                                                         | Stress Disorders, Post-Traumatic/                                                                                                                                                                | 2215    |            |
| 13                                                                         | exp anxiety disorders/                                                                                                                                                                           | 7964    |            |
| 14                                                                         | exp depression/                                                                                                                                                                                  | 10330   |            |
| 15                                                                         | exp Depressive Disorder/                                                                                                                                                                         | 10814   |            |
| 16                                                                         | exp bipolar disorder/                                                                                                                                                                            | 2399    |            |
| 17                                                                         | Fetal Alcohol Spectrum Disorders/                                                                                                                                                                | 64      |            |
| 18                                                                         | (psychosis or psychoses or psychotic or schizophre* or adhd or attention deficit disorder*).mp.                                                                                                  | 26645   |            |
| 19                                                                         | (tics or tourette* or intellectual development disorder* or intellectual disabilit* or fragile x).mp.                                                                                            | 2013    |            |
| 20                                                                         | (autism or autistic or Child Behavior Disorder* or pervasive development disorder or major depression or fetal alcohol or post traumatic stress disorder* or posttraumatic stress disorder*).mp. | 15983   |            |
| 21                                                                         | (anxiety disorder* or severe behavioral disturbance* or challenging behavior*).mp.                                                                                                               | 9728    |            |
| 22                                                                         | 5 or 6 or 7 or 8 or 9 or 10 or 11 or 12 or 13 or 14 or 15 or 16 or 17 or 18 or 19 or 20 or 21                                                                                                    | 67914   |            |
| 23                                                                         | 4 and 22                                                                                                                                                                                         | 715     |            |
| 24                                                                         | limit 23 to yr="1980 -Current"                                                                                                                                                                   | 699     |            |
| 25                                                                         | adolescent/ or child/ or infant/                                                                                                                                                                 | 130670  |            |
| 26                                                                         | 24 and 25                                                                                                                                                                                        | 112     |            |

[Execute Searches in Ovid](#)

Search for: limit 24 to (human and yr="1980 -Current")

Results: 1

| PsycINFO <1806 to September Week 5 2019> |                                                                                                                                                                                    |         |            |
|------------------------------------------|------------------------------------------------------------------------------------------------------------------------------------------------------------------------------------|---------|------------|
| #                                        | Search Statement                                                                                                                                                                   | Results | Annotation |
| 1                                        | exp cannabinoids/                                                                                                                                                                  | 5283    |            |
| 2                                        | exp cannabis/                                                                                                                                                                      | 7912    |            |
| 3                                        | (cannabi* or hemp* or marijuana* or nabilone or thc* or sativex or dronabinol or Nabiximol* or epidiolex or Levonantradol or Ajulemic acid or ECP002A or tetrahydrocannabinol).mp. | 25547   |            |
| 4                                        | 1 or 2 or 3                                                                                                                                                                        | 25578   |            |
| 5                                        | exp psychosis/                                                                                                                                                                     | 113480  |            |
| 6                                        | exp schizophrenia/                                                                                                                                                                 | 88619   |            |
| 7                                        | exp attention deficit disorder/                                                                                                                                                    | 26116   |            |
| 8                                        | tics/                                                                                                                                                                              | 1724    |            |
| 9                                        | tourette syndrome/                                                                                                                                                                 | 3082    |            |
| 10                                       | exp intellectual development disorder/                                                                                                                                             | 43900   |            |
| 11                                       | fragile x syndrome/                                                                                                                                                                | 1733    |            |
| 12                                       | exp bipolar disorder/                                                                                                                                                              | 29584   |            |
| 13                                       | exp autism spectrum disorders/                                                                                                                                                     | 41401   |            |
| 14                                       | exp major depression/                                                                                                                                                              | 125391  |            |
| 15                                       | fetal alcohol syndrome/                                                                                                                                                            | 1715    |            |
| 16                                       | exp posttraumatic stress disorder/                                                                                                                                                 | 31398   |            |
| 17                                       | exp anxiety disorders/                                                                                                                                                             | 52309   |            |
| 18                                       | (psychosis or psychoses or psychotic or schizophre* or adhd or attention deficit disorder*).mp.                                                                                    | 213457  |            |
| 19                                       | (tics or tourette* or intellectual development disorder* or intellectual disabilit* or fragile x).mp.                                                                              | 56470   |            |
| 20                                       | (autism or autistic or pervasive development disorder or major depression or fetal alcohol or post traumatic stress disorder* or posttraumatic stress disorder*).mp.               | 215343  |            |
| 21                                       | (anxiety disorder* or severe behavioral disturbance* or challenging behavior*).mp.                                                                                                 | 52396   |            |
| 22                                       | 5 or 6 or 7 or 8 or 9 or 10 or 11 or 12 or 13 or 14 or 15 or 16 or 17 or 18 or 19 or 20 or 21                                                                                      | 532252  |            |
| 23                                       | 4 and 22                                                                                                                                                                           | 4413    |            |
| 24                                       | limit 23 to (100 childhood <birth to age 12 yrs> or 200 adolescence <age 13 to 17 yrs>)                                                                                            | 970     |            |
| 25                                       | limit 24 to (human and yr="1980 -Current")                                                                                                                                         | 954     |            |

[Execute Searches in Ovid](#)

## Search strategy for SAFETY

Search for: limit 29 to (human and clinical trial and yr="1980 -Current" and (preschool child <1 to 6 years> or school child <7 to 12 years> or adolescent <13 to 17 years>))

Results: 1

| Embase Classic+Embase <1947 to 2019 October 04> |                                                                                                                                                                                                  |         |            |
|-------------------------------------------------|--------------------------------------------------------------------------------------------------------------------------------------------------------------------------------------------------|---------|------------|
| #                                               | Search Statement                                                                                                                                                                                 | Results | Annotation |
| 1                                               | exp cannabinoid/                                                                                                                                                                                 | 66067   |            |
| 2                                               | (cannabi* or hemp* or marijuana* or nabilone or thc* or sativex or dronabinol or Nabiximol* or epidiolex or Levonantradol or Ajulemic acid or ECP002A or tetrahydrocannabinol).mp.               | 89434   |            |
| 3                                               | 1 or 2                                                                                                                                                                                           | 94006   |            |
| 4                                               | exp psychosis/                                                                                                                                                                                   | 302918  |            |
| 5                                               | attention deficit disorder/                                                                                                                                                                      | 58411   |            |
| 6                                               | tic/                                                                                                                                                                                             | 9545    |            |
| 7                                               | Gilles de la Tourette syndrome/                                                                                                                                                                  | 8013    |            |
| 8                                               | intellectual impairment/                                                                                                                                                                         | 25752   |            |
| 9                                               | fragile X syndrome/                                                                                                                                                                              | 8314    |            |
| 10                                              | exp autism/                                                                                                                                                                                      | 66143   |            |
| 11                                              | posttraumatic stress disorder/                                                                                                                                                                   | 57130   |            |
| 12                                              | exp anxiety disorder/                                                                                                                                                                            | 235210  |            |
| 13                                              | major depression/                                                                                                                                                                                | 61354   |            |
| 14                                              | exp bipolar disorder/                                                                                                                                                                            | 63127   |            |
| 15                                              | fetal alcohol syndrome/                                                                                                                                                                          | 6604    |            |
| 16                                              | (psychosis or psychoses or psychotic or schizophre* or adhd or attention deficit disorder*).mp.                                                                                                  | 366094  |            |
| 17                                              | (tics or tourette* or intellectual development disorder* or intellectual disabilit* or fragile x).mp.                                                                                            | 46441   |            |
| 18                                              | (autism or autistic or Child Behavior Disorder* or pervasive development disorder or major depression or fetal alcohol or post traumatic stress disorder* or posttraumatic stress disorder*).mp. | 209585  |            |
| 19                                              | (anxiety disorder* or severe behavioral disturbance* or challenging behavior*).mp.                                                                                                               | 92879   |            |
| 20                                              | exp epilepsy/                                                                                                                                                                                    | 249628  |            |
| 21                                              | exp seizure/                                                                                                                                                                                     | 153756  |            |
| 22                                              | multiple sclerosis/                                                                                                                                                                              | 127812  |            |
| 23                                              | chronic pain/                                                                                                                                                                                    | 58438   |            |
| 24                                              | spasticity/                                                                                                                                                                                      | 27064   |            |
| 25                                              | "chemotherapy induced nausea and vomiting"/                                                                                                                                                      | 3150    |            |
| 26                                              | chemotherapy induced emesis/                                                                                                                                                                     | 5888    |            |
| 27                                              | (epilep* or Lennox* or Dravet* or spasticity or cinv or chemotherapy* or chronic pain or multiple sclerosis).mp.                                                                                 | 1281790 |            |
| 28                                              | 4 or 5 or 6 or 7 or 8 or 9 or 10 or 11 or 12 or 13 or 14 or 15 or 16 or 17 or 18 or 19 or 20 or 21 or 22 or 23 or 24 or 25 or 26 or 27                                                           | 2111195 |            |
| 29                                              | 3 and 28                                                                                                                                                                                         | 19826   |            |
| 30                                              | limit 29 to (human and clinical trial and yr="1980 -Current" and (preschool child <1 to 6 years> or school child <7 to 12 years> or adolescent <13 to 17 years>))                                | 85      |            |

[Execute Searches in Ovid](#)

Search for: limit 30 to (humans and yr="1980 -Current" and "all child (0 to 18 years)" and clinical trial, all)

Results: 1

| Ovid MEDLINE(R) ALL <1946 to October 04, 2019> |                                                                                                                                                                                                     |         |            |
|------------------------------------------------|-----------------------------------------------------------------------------------------------------------------------------------------------------------------------------------------------------|---------|------------|
| #                                              | Search Statement                                                                                                                                                                                    | Results | Annotation |
| 1                                              | exp Cannabinoids/                                                                                                                                                                                   | 13338   |            |
| 2                                              | Cannabis/                                                                                                                                                                                           | 8635    |            |
| 3                                              | (cannabi* or hemp* or marijuana* or nabilone or thc* or sativex or dronabinol or Nabiximol* or epidiolex or Levonantradol or Ajulemic acid or ECP002A or tetrahydrocannabinol).mp.                  | 54594   |            |
| 4                                              | 1 or 2 or 3                                                                                                                                                                                         | 54594   |            |
| 5                                              | psychotic disorders/ or psychoses, substance-induced/                                                                                                                                               | 48917   |            |
| 6                                              | exp Schizophrenia/                                                                                                                                                                                  | 102001  |            |
| 7                                              | exp "Attention Deficit and Disruptive Behavior Disorders"/                                                                                                                                          | 31325   |            |
| 8                                              | Tics/                                                                                                                                                                                               | 866     |            |
| 9                                              | Tourette Syndrome/                                                                                                                                                                                  | 4203    |            |
| 10                                             | exp Intellectual Disability/                                                                                                                                                                        | 93687   |            |
| 11                                             | Fragile X Syndrome/                                                                                                                                                                                 | 4877    |            |
| 12                                             | exp Child Development Disorders, Pervasive/                                                                                                                                                         | 32767   |            |
| 13                                             | bipolar disorder/                                                                                                                                                                                   | 39203   |            |
| 14                                             | Child Behavior Disorders/                                                                                                                                                                           | 20021   |            |
| 15                                             | Depressive Disorder, Major/                                                                                                                                                                         | 28535   |            |
| 16                                             | Fetal Alcohol Spectrum Disorders/                                                                                                                                                                   | 4056    |            |
| 17                                             | Stress Disorders, Post-Traumatic/                                                                                                                                                                   | 30880   |            |
| 18                                             | exp Anxiety Disorders/                                                                                                                                                                              | 77261   |            |
| 19                                             | (psychosis or psychoses or psychotic or schizophreni* or adhd or attention deficit disorder*).mp.                                                                                                   | 231289  |            |
| 20                                             | (tics or tourette* or intellectual development disorder* or intellectual disabilit* or fragile x).mp.                                                                                               | 75871   |            |
| 21                                             | (autism or autistic or Child Behavior?r Disorder* or pervasive development disorder or major depression or f?etal alcohol or post traumatic stress disorder* or posttraumatic stress disorder*).mp. | 122140  |            |
| 22                                             | (anxiety disorder* or severe behavio?ral disturbance* or challenging behavio?r).mp.                                                                                                                 | 49854   |            |
| 23                                             | exp Epilepsy/                                                                                                                                                                                       | 108189  |            |
| 24                                             | exp Seizures/                                                                                                                                                                                       | 61148   |            |
| 25                                             | Multiple Sclerosis/                                                                                                                                                                                 | 50435   |            |
| 26                                             | Chronic Pain/                                                                                                                                                                                       | 12768   |            |
| 27                                             | Muscle Spasticity/                                                                                                                                                                                  | 8832    |            |
| 28                                             | (epilep* or Lennox* or Dravet* or spasticity or cinv or chemotherapy* or chronic pain or multiple sclerosis).mp.                                                                                    | 709152  |            |
| 29                                             | 5 or 6 or 7 or 8 or 9 or 10 or 11 or 12 or 13 or 14 or 15 or 16 or 17 or 18 or 19 or 20 or 21 or 22 or 23 or 24 or 25 or 26 or 27 or 28                                                             | 1283072 |            |
| 30                                             | 4 and 29                                                                                                                                                                                            | 7510    |            |
| 31                                             | limit 30 to (humans and yr="1980 -Current" and "all child (0 to 18 years)" and clinical trial, all)                                                                                                 | 143     |            |

[Execute Searches in Ovid](#)

Search for: limit 30 to yr="1980 -Current"

Results: 25

| EBM Reviews - Cochrane Central Register of Controlled Trials <August 2019> |                                                                                                                                                                                                     |         |            |
|----------------------------------------------------------------------------|-----------------------------------------------------------------------------------------------------------------------------------------------------------------------------------------------------|---------|------------|
| #                                                                          | Search Statement                                                                                                                                                                                    | Results | Annotation |
| 1                                                                          | exp cannabinoids/                                                                                                                                                                                   | 731     |            |
| 2                                                                          | cannabis/                                                                                                                                                                                           | 291     |            |
| 3                                                                          | (cannabi* or hemp* or marijuana* or nabilone or thec* or sativex or dronabinol or Nabiximol* or epidiolex or Levonantradol or Ajulemic acid or ECP002A or tetrahydrocannabinol).mp.                 | 4554    |            |
| 4                                                                          | 1 or 2 or 3                                                                                                                                                                                         | 4554    |            |
| 5                                                                          | exp "Schizophrenia and Disorders with Psychotic Features"/                                                                                                                                          | 8104    |            |
| 6                                                                          | Tic disorders/                                                                                                                                                                                      | 97      |            |
| 7                                                                          | tics/                                                                                                                                                                                               | 61      |            |
| 8                                                                          | Tourette syndrome/                                                                                                                                                                                  | 226     |            |
| 9                                                                          | exp intellectual disability/                                                                                                                                                                        | 1275    |            |
| 10                                                                         | exp Child Development Disorders, Pervasive/                                                                                                                                                         | 1107    |            |
| 11                                                                         | Child behavior disorders/                                                                                                                                                                           | 828     |            |
| 12                                                                         | Stress Disorders, Post-Traumatic/                                                                                                                                                                   | 2215    |            |
| 13                                                                         | exp anxiety disorders/                                                                                                                                                                              | 7964    |            |
| 14                                                                         | exp depression/                                                                                                                                                                                     | 10330   |            |
| 15                                                                         | exp Depressive Disorder/                                                                                                                                                                            | 10814   |            |
| 16                                                                         | exp bipolar disorder/                                                                                                                                                                               | 2399    |            |
| 17                                                                         | Fetal Alcohol Spectrum Disorders/                                                                                                                                                                   | 64      |            |
| 18                                                                         | (psychosis or psychoses or psychotic or schizophre* or adhd or attention deficit disorder*).mp.                                                                                                     | 26645   |            |
| 19                                                                         | (tics or tourette* or intellectual development disorder* or intellectual disabilit* or fragile x).mp.                                                                                               | 2013    |            |
| 20                                                                         | (autism or autistic or Child Behavior?r Disorder* or pervasive development disorder or major depression or f?etal alcohol or post traumatic stress disorder* or posttraumatic stress disorder*).mp. | 15983   |            |
| 21                                                                         | (anxiety disorder* or severe behavio?ral disturbance* or challenging behavio?r).mp.                                                                                                                 | 9728    |            |
| 22                                                                         | exp Epilepsy/                                                                                                                                                                                       | 2725    |            |
| 23                                                                         | muscle spasticity/                                                                                                                                                                                  | 785     |            |
| 24                                                                         | exp multiple sclerosis/                                                                                                                                                                             | 2991    |            |
| 25                                                                         | chronic pain/                                                                                                                                                                                       | 1876    |            |
| 26                                                                         | (epilep* or Lennox* or Dravet* or spasticity or cinv or chemotherapy* or chronic pain or multiple sclerosis).mp.                                                                                    | 99509   |            |
| 27                                                                         | 5 or 6 or 7 or 8 or 9 or 10 or 11 or 12 or 13 or 14 or 15 or 16 or 17 or 18 or 19 or 20 or 21 or 22 or 23 or 24 or 25 or 26                                                                         | 165923  |            |
| 28                                                                         | 4 and 27                                                                                                                                                                                            | 1258    |            |
| 29                                                                         | adolescent/ or child/ or infant/                                                                                                                                                                    | 130670  |            |
| 30                                                                         | 28 and 29                                                                                                                                                                                           | 147     |            |
| 31                                                                         | limit 30 to yr="1980 -Current"                                                                                                                                                                      | 142     |            |

[Execute Searches in Ovid](#)

Search for: limit 29 to (human and "0300 clinical trial" and (childhood or adolescence <13 to 17 years>) and yr="1980 -Current")

Results: 1

| PsycINFO <1806 to September Week 5 2019> |                                                                                                                                                                                    |         |            |
|------------------------------------------|------------------------------------------------------------------------------------------------------------------------------------------------------------------------------------|---------|------------|
| #                                        | Search Statement                                                                                                                                                                   | Results | Annotation |
| 1                                        | exp cannabinoids/                                                                                                                                                                  | 5283    |            |
| 2                                        | exp cannabis/                                                                                                                                                                      | 7912    |            |
| 3                                        | (cannabi* or hemp* or marijuana* or nabilone or the* or sativex or dronabinol or Nabiximol* or epidiolex or Levonantradol or Ajulemic acid or ECP002A or tetrahydrocannabinol).mp. | 25547   |            |
| 4                                        | 1 or 2 or 3                                                                                                                                                                        | 25578   |            |
| 5                                        | exp psychosis/                                                                                                                                                                     | 113480  |            |
| 6                                        | exp schizophrenia/                                                                                                                                                                 | 88619   |            |
| 7                                        | exp attention deficit disorder/                                                                                                                                                    | 26116   |            |
| 8                                        | tics/                                                                                                                                                                              | 1724    |            |
| 9                                        | tourette syndrome/                                                                                                                                                                 | 3082    |            |
| 10                                       | exp intellectual development disorder/                                                                                                                                             | 43900   |            |
| 11                                       | fragile x syndrome/                                                                                                                                                                | 1733    |            |
| 12                                       | exp bipolar disorder/                                                                                                                                                              | 29584   |            |
| 13                                       | exp autism spectrum disorders/                                                                                                                                                     | 41401   |            |
| 14                                       | exp major depression/                                                                                                                                                              | 125391  |            |
| 15                                       | fetal alcohol syndrome/                                                                                                                                                            | 1715    |            |
| 16                                       | exp posttraumatic stress disorder/                                                                                                                                                 | 31398   |            |
| 17                                       | exp anxiety disorders/                                                                                                                                                             | 52309   |            |
| 18                                       | (psychosis or psychoses or psychotic or schizophre* or adhd or attention deficit disorder*).mp.                                                                                    | 213457  |            |
| 19                                       | (tics or tourette* or intellectual development disorder* or intellectual disabilit* or fragile x).mp.                                                                              | 56470   |            |
| 20                                       | (autism or autistic or pervasive development disorder or major depression or fetal alcohol or post traumatic stress disorder* or posttraumatic stress disorder*).mp.               | 215343  |            |
| 21                                       | (anxiety disorder* or severe behavior* or challenging behavior*).mp.                                                                                                               | 52396   |            |
| 22                                       | exp epilepsy/                                                                                                                                                                      | 26722   |            |
| 23                                       | exp seizures/                                                                                                                                                                      | 15796   |            |
| 24                                       | multiple sclerosis/                                                                                                                                                                | 12431   |            |
| 25                                       | chronic pain/                                                                                                                                                                      | 12873   |            |
| 26                                       | chemotherapy/                                                                                                                                                                      | 2925    |            |
| 27                                       | (epilep* or Lennox* or Dravet* or spasticity or cinv or chemotherapy* or chronic pain or multiple sclerosis).mp.                                                                   | 85323   |            |
| 28                                       | 5 or 6 or 7 or 8 or 9 or 10 or 11 or 12 or 13 or 14 or 15 or 16 or 17 or 18 or 19 or 20 or 21 or 22 or 23 or 24 or 25 or 26 or 27                                                  | 608284  |            |
| 29                                       | 4 and 28                                                                                                                                                                           | 5177    |            |
| 30                                       | limit 29 to (human and "0300 clinical trial" and (childhood <birth to 12 years> or adolescence <13 to 17 years>) and yr="1980 -Current")                                           | 24      |            |

[Execute Searches in Ovid](#)
