# Supplementary material for: Efficacy of cannabinoids in neurodevelopmental and neuropsychiatric disorders among children and adolescents: a systematic review
Source: Springer Nature journal article supplement (doi:10.1007/s00787-023-02169-w), 2023-03-03
Supplement: MOESM5 [file 787_2023_2169_MOESM5_ESM-1.pdf]

### Search strategy for EFFICACY

Search for: limit 21 to (human and yr="1980 -Current" and (preschool child <1 to 6 years> or school child <7 to 12 years> or adolescent <13 to 17 years>))

Results: 1

| Embase Classic+Embase <1947 to 2019 October 04> |                                                                                                                                                                                                    |         |            |
|-------------------------------------------------|----------------------------------------------------------------------------------------------------------------------------------------------------------------------------------------------------|---------|------------|
| #                                               | Search Statement                                                                                                                                                                                   | Results | Annotation |
| 1                                               | exp cannabinoid/                                                                                                                                                                                   | 66067   |            |
| 2                                               | (cannabi* or hemp* or marijuana* or nabilone or thc* or sativex or dronabinol or Nabiximol* or epidiolex or Levonantradol or Ajulemic acid or ECP002A or tetrahydrocannabinol).mp.                 | 89434   |            |
| 3                                               | 1 or 2                                                                                                                                                                                             | 94006   |            |
| 4                                               | exp psychosis/                                                                                                                                                                                     | 302918  |            |
| 5                                               | attention deficit disorder/                                                                                                                                                                        | 58411   |            |
| 6                                               | tic/                                                                                                                                                                                               | 9545    |            |
| 7                                               | Gilles de la Tourette syndrome/                                                                                                                                                                    | 8013    |            |
| 8                                               | intellectual impairment/                                                                                                                                                                           | 25752   |            |
| 9                                               | fragile X syndrome/                                                                                                                                                                                | 8314    |            |
| 10                                              | exp autism/                                                                                                                                                                                        | 66143   |            |
| 11                                              | posttraumatic stress disorder/                                                                                                                                                                     | 57130   |            |
| 12                                              | exp anxiety disorder/                                                                                                                                                                              | 235210  |            |
| 13                                              | major depression/                                                                                                                                                                                  | 61354   |            |
| 14                                              | exp bipolar disorder/                                                                                                                                                                              | 63127   |            |
| 15                                              | fetal alcohol syndrome/                                                                                                                                                                            | 6604    |            |
| 16                                              | (psychosis or psychoses or psychotic or schizophre* or adhd or attention deficit disorder*).mp.                                                                                                    | 366094  |            |
| 17                                              | (tics or tourette* or intellectual development disorder* or intellectual disabilit* or fragile x).mp.                                                                                              | 46441   |            |
| 18                                              | (autism or autistic or Child Behavior?r Disorder* or pervasive development disorder or major depression or fetal alcohol or post traumatic stress disorder* or posttraumatic stress disorder*).mp. | 209585  |            |
| 19                                              | (anxiety disorder* or severe behavior?ral disturbance* or challenging behavior?r).mp.                                                                                                              | 92879   |            |
| 20                                              | 4 or 5 or 6 or 7 or 8 or 9 or 10 or 11 or 12 or 13 or 14 or 15 or 16 or 17 or 18 or 19                                                                                                             | 786493  |            |
| 21                                              | 3 and 20                                                                                                                                                                                           | 13366   |            |
| 22                                              | limit 21 to (human and yr="1980 -Current" and (preschool child <1 to 6 years> or school child <7 to 12 years> or adolescent <13 to 17 years>))                                                     | 1907    |            |

[Execute Searches in Ovid](#)

Search for: limit 24 to (humans and yr="1980 -Current" and "all child (0 to 18 years)")

Results: 1

| Ovid MEDLINE(R) ALL <1946 to October 04, 2019> |                                                                                                                                                                                                  |         |            |
|------------------------------------------------|--------------------------------------------------------------------------------------------------------------------------------------------------------------------------------------------------|---------|------------|
| #                                              | Search Statement                                                                                                                                                                                 | Results | Annotation |
| 1                                              | exp Cannabinoids/                                                                                                                                                                                | 13338   |            |
| 2                                              | Cannabis/                                                                                                                                                                                        | 8635    |            |
| 3                                              | (cannabi* or hemp* or marijuana* or nabilone or thc* or sativex or dronabinol or Nabiximol* or epidiolex or Levonantradol or Ajulemic acid or ECP002A or tetrahydrocannabinol).mp.               | 54594   |            |
| 4                                              | 1 or 2 or 3                                                                                                                                                                                      | 54594   |            |
| 5                                              | psychotic disorders/ or psychoses, substance-induced/                                                                                                                                            | 48917   |            |
| 6                                              | exp Schizophrenia/                                                                                                                                                                               | 102001  |            |
| 7                                              | exp "Attention Deficit and Disruptive Behavior Disorders"/                                                                                                                                       | 31325   |            |
| 8                                              | Tics/                                                                                                                                                                                            | 866     |            |
| 9                                              | Tourette Syndrome/                                                                                                                                                                               | 4203    |            |
| 10                                             | exp Intellectual Disability/                                                                                                                                                                     | 93687   |            |
| 11                                             | Fragile X Syndrome/                                                                                                                                                                              | 4877    |            |
| 12                                             | exp Child Development Disorders, Pervasive/                                                                                                                                                      | 32767   |            |
| 13                                             | bipolar disorder/                                                                                                                                                                                | 39203   |            |
| 14                                             | Child Behavior Disorders/                                                                                                                                                                        | 20021   |            |
| 15                                             | Depressive Disorder, Major/                                                                                                                                                                      | 28535   |            |
| 16                                             | Fetal Alcohol Spectrum Disorders/                                                                                                                                                                | 4056    |            |
| 17                                             | Stress Disorders, Post-Traumatic/                                                                                                                                                                | 30880   |            |
| 18                                             | exp Anxiety Disorders/                                                                                                                                                                           | 77261   |            |
| 19                                             | (psychosis or psychoses or psychotic or schizophre* or adhd or attention deficit disorder*).mp.                                                                                                  | 231289  |            |
| 20                                             | (tics or tourette* or intellectual development disorder* or intellectual disabilit* or fragile x).mp.                                                                                            | 75871   |            |
| 21                                             | (autism or autistic or Child Behavior Disorder* or pervasive development disorder or major depression or fetal alcohol or post traumatic stress disorder* or posttraumatic stress disorder*).mp. | 122140  |            |
| 22                                             | (anxiety disorder* or severe behavioral disturbance* or challenging behavior*).mp.                                                                                                               | 49854   |            |
| 23                                             | 5 or 6 or 7 or 8 or 9 or 10 or 11 or 12 or 13 or 14 or 15 or 16 or 17 or 18 or 19 or 20 or 21 or 22                                                                                              | 560264  |            |
| 24                                             | 4 and 23                                                                                                                                                                                         | 4874    |            |
| 25                                             | limit 24 to (humans and yr="1980 -Current" and "all child (0 to 18 years)")                                                                                                                      | 1534    |            |

[Execute Searches in Ovid](#)

Search for: 24 and 25

Results: 1

| EBM Reviews - Cochrane Central Register of Controlled Trials <August 2019> |                                                                                                                                                                                                  |         |            |
|----------------------------------------------------------------------------|--------------------------------------------------------------------------------------------------------------------------------------------------------------------------------------------------|---------|------------|
| #                                                                          | Search Statement                                                                                                                                                                                 | Results | Annotation |
| 1                                                                          | exp cannabinoids/                                                                                                                                                                                | 731     |            |
| 2                                                                          | cannabis/                                                                                                                                                                                        | 291     |            |
| 3                                                                          | (cannabi* or hemp* or marijuana* or nabilone or thc* or sativex or dronabinol or Nabiximol* or epidiolex or Levonantradol or Ajulemic acid or ECP002A or tetrahydrocannabinol).mp.               | 4554    |            |
| 4                                                                          | 1 or 2 or 3                                                                                                                                                                                      | 4554    |            |
| 5                                                                          | exp "Schizophrenia and Disorders with Psychotic Features"/                                                                                                                                       | 8104    |            |
| 6                                                                          | Tic disorders/                                                                                                                                                                                   | 97      |            |
| 7                                                                          | tics/                                                                                                                                                                                            | 61      |            |
| 8                                                                          | Tourette syndrome/                                                                                                                                                                               | 226     |            |
| 9                                                                          | exp intellectual disability/                                                                                                                                                                     | 1275    |            |
| 10                                                                         | exp Child Development Disorders, Pervasive/                                                                                                                                                      | 1107    |            |
| 11                                                                         | Child behavior disorders/                                                                                                                                                                        | 828     |            |
| 12                                                                         | Stress Disorders, Post-Traumatic/                                                                                                                                                                | 2215    |            |
| 13                                                                         | exp anxiety disorders/                                                                                                                                                                           | 7964    |            |
| 14                                                                         | exp depression/                                                                                                                                                                                  | 10330   |            |
| 15                                                                         | exp Depressive Disorder/                                                                                                                                                                         | 10814   |            |
| 16                                                                         | exp bipolar disorder/                                                                                                                                                                            | 2399    |            |
| 17                                                                         | Fetal Alcohol Spectrum Disorders/                                                                                                                                                                | 64      |            |
| 18                                                                         | (psychosis or psychoses or psychotic or schizophre* or adhd or attention deficit disorder*).mp.                                                                                                  | 26645   |            |
| 19                                                                         | (tics or tourette* or intellectual development disorder* or intellectual disabilit* or fragile x).mp.                                                                                            | 2013    |            |
| 20                                                                         | (autism or autistic or Child Behavior Disorder* or pervasive development disorder or major depression or fetal alcohol or post traumatic stress disorder* or posttraumatic stress disorder*).mp. | 15983   |            |
| 21                                                                         | (anxiety disorder* or severe behavioral disturbance* or challenging behavior*).mp.                                                                                                               | 9728    |            |
| 22                                                                         | 5 or 6 or 7 or 8 or 9 or 10 or 11 or 12 or 13 or 14 or 15 or 16 or 17 or 18 or 19 or 20 or 21                                                                                                    | 67914   |            |
| 23                                                                         | 4 and 22                                                                                                                                                                                         | 715     |            |
| 24                                                                         | limit 23 to yr="1980 -Current"                                                                                                                                                                   | 699     |            |
| 25                                                                         | adolescent/ or child/ or infant/                                                                                                                                                                 | 130670  |            |
| 26                                                                         | 24 and 25                                                                                                                                                                                        | 112     |            |

[Execute Searches in Ovid](#)

Search for: limit 24 to (human and yr="1980 -Current")

Results: 1

| PsycINFO <1806 to September Week 5 2019> |                                                                                                                                                                                    |         |            |
|------------------------------------------|------------------------------------------------------------------------------------------------------------------------------------------------------------------------------------|---------|------------|
| #                                        | Search Statement                                                                                                                                                                   | Results | Annotation |
| 1                                        | exp cannabinoids/                                                                                                                                                                  | 5283    |            |
| 2                                        | exp cannabis/                                                                                                                                                                      | 7912    |            |
| 3                                        | (cannabi* or hemp* or marijuana* or nabilone or thc* or sativex or dronabinol or Nabiximol* or epidiolex or Levonantradol or Ajulemic acid or ECP002A or tetrahydrocannabinol).mp. | 25547   |            |
| 4                                        | 1 or 2 or 3                                                                                                                                                                        | 25578   |            |
| 5                                        | exp psychosis/                                                                                                                                                                     | 113480  |            |
| 6                                        | exp schizophrenia/                                                                                                                                                                 | 88619   |            |
| 7                                        | exp attention deficit disorder/                                                                                                                                                    | 26116   |            |
| 8                                        | tics/                                                                                                                                                                              | 1724    |            |
| 9                                        | tourette syndrome/                                                                                                                                                                 | 3082    |            |
| 10                                       | exp intellectual development disorder/                                                                                                                                             | 43900   |            |
| 11                                       | fragile x syndrome/                                                                                                                                                                | 1733    |            |
| 12                                       | exp bipolar disorder/                                                                                                                                                              | 29584   |            |
| 13                                       | exp autism spectrum disorders/                                                                                                                                                     | 41401   |            |
| 14                                       | exp major depression/                                                                                                                                                              | 125391  |            |
| 15                                       | fetal alcohol syndrome/                                                                                                                                                            | 1715    |            |
| 16                                       | exp posttraumatic stress disorder/                                                                                                                                                 | 31398   |            |
| 17                                       | exp anxiety disorders/                                                                                                                                                             | 52309   |            |
| 18                                       | (psychosis or psychoses or psychotic or schizophre* or adhd or attention deficit disorder*).mp.                                                                                    | 213457  |            |
| 19                                       | (tics or tourette* or intellectual development disorder* or intellectual disabilit* or fragile x).mp.                                                                              | 56470   |            |
| 20                                       | (autism or autistic or pervasive development disorder or major depression or fetal alcohol or post traumatic stress disorder* or posttraumatic stress disorder*).mp.               | 215343  |            |
| 21                                       | (anxiety disorder* or severe behavioral disturbance* or challenging behavior*).mp.                                                                                                 | 52396   |            |
| 22                                       | 5 or 6 or 7 or 8 or 9 or 10 or 11 or 12 or 13 or 14 or 15 or 16 or 17 or 18 or 19 or 20 or 21                                                                                      | 532252  |            |
| 23                                       | 4 and 22                                                                                                                                                                           | 4413    |            |
| 24                                       | limit 23 to (100 childhood <birth to age 12 yrs> or 200 adolescence <age 13 to 17 yrs>)                                                                                            | 970     |            |
| 25                                       | limit 24 to (human and yr="1980 -Current")                                                                                                                                         | 954     |            |

[Execute Searches in Ovid](#)

## Search strategy for SAFETY

Search for: limit 29 to (human and clinical trial and yr="1980 -Current" and (preschool child <1 to 6 years> or school child <7 to 12 years> or adolescent <13 to 17 years>))

Results: 1

| Embase Classic+Embase <1947 to 2019 October 04> |                                                                                                                                                                                                  |         |            |
|-------------------------------------------------|--------------------------------------------------------------------------------------------------------------------------------------------------------------------------------------------------|---------|------------|
| #                                               | Search Statement                                                                                                                                                                                 | Results | Annotation |
| 1                                               | exp cannabinoid/                                                                                                                                                                                 | 66067   |            |
| 2                                               | (cannabi* or hemp* or marijuana* or nabilone or thc* or sativex or dronabinol or Nabiximol* or epidiolex or Levonantradol or Ajulemic acid or ECP002A or tetrahydrocannabinol).mp.               | 89434   |            |
| 3                                               | 1 or 2                                                                                                                                                                                           | 94006   |            |
| 4                                               | exp psychosis/                                                                                                                                                                                   | 302918  |            |
| 5                                               | attention deficit disorder/                                                                                                                                                                      | 58411   |            |
| 6                                               | tic/                                                                                                                                                                                             | 9545    |            |
| 7                                               | Gilles de la Tourette syndrome/                                                                                                                                                                  | 8013    |            |
| 8                                               | intellectual impairment/                                                                                                                                                                         | 25752   |            |
| 9                                               | fragile X syndrome/                                                                                                                                                                              | 8314    |            |
| 10                                              | exp autism/                                                                                                                                                                                      | 66143   |            |
| 11                                              | posttraumatic stress disorder/                                                                                                                                                                   | 57130   |            |
| 12                                              | exp anxiety disorder/                                                                                                                                                                            | 235210  |            |
| 13                                              | major depression/                                                                                                                                                                                | 61354   |            |
| 14                                              | exp bipolar disorder/                                                                                                                                                                            | 63127   |            |
| 15                                              | fetal alcohol syndrome/                                                                                                                                                                          | 6604    |            |
| 16                                              | (psychosis or psychoses or psychotic or schizophre* or adhd or attention deficit disorder*).mp.                                                                                                  | 366094  |            |
| 17                                              | (tics or tourette* or intellectual development disorder* or intellectual disabilit* or fragile x).mp.                                                                                            | 46441   |            |
| 18                                              | (autism or autistic or Child Behavior Disorder* or pervasive development disorder or major depression or fetal alcohol or post traumatic stress disorder* or posttraumatic stress disorder*).mp. | 209585  |            |
| 19                                              | (anxiety disorder* or severe behavioral disturbance* or challenging behavior*).mp.                                                                                                               | 92879   |            |
| 20                                              | exp epilepsy/                                                                                                                                                                                    | 249628  |            |
| 21                                              | exp seizure/                                                                                                                                                                                     | 153756  |            |
| 22                                              | multiple sclerosis/                                                                                                                                                                              | 127812  |            |
| 23                                              | chronic pain/                                                                                                                                                                                    | 58438   |            |
| 24                                              | spasticity/                                                                                                                                                                                      | 27064   |            |
| 25                                              | "chemotherapy induced nausea and vomiting"/                                                                                                                                                      | 3150    |            |
| 26                                              | chemotherapy induced emesis/                                                                                                                                                                     | 5888    |            |
| 27                                              | (epilep* or Lennox* or Dravet* or spasticity or cinv or chemotherapy* or chronic pain or multiple sclerosis).mp.                                                                                 | 1281790 |            |
| 28                                              | 4 or 5 or 6 or 7 or 8 or 9 or 10 or 11 or 12 or 13 or 14 or 15 or 16 or 17 or 18 or 19 or 20 or 21 or 22 or 23 or 24 or 25 or 26 or 27                                                           | 2111195 |            |
| 29                                              | 3 and 28                                                                                                                                                                                         | 19826   |            |
| 30                                              | limit 29 to (human and clinical trial and yr="1980 -Current" and (preschool child <1 to 6 years> or school child <7 to 12 years> or adolescent <13 to 17 years>))                                | 85      |            |

[Execute Searches in Ovid](#)

Search for: limit 30 to (humans and yr="1980 -Current" and "all child (0 to 18 years)" and clinical trial, all)

Results: 1

| Ovid MEDLINE(R) ALL <1946 to October 04, 2019> |                                                                                                                                                                                                     |         |            |
|------------------------------------------------|-----------------------------------------------------------------------------------------------------------------------------------------------------------------------------------------------------|---------|------------|
| #                                              | Search Statement                                                                                                                                                                                    | Results | Annotation |
| 1                                              | exp Cannabinoids/                                                                                                                                                                                   | 13338   |            |
| 2                                              | Cannabis/                                                                                                                                                                                           | 8635    |            |
| 3                                              | (cannabi* or hemp* or marijuana* or nabilone or thc* or sativex or dronabinol or Nabiximol* or epidiolex or Levonantradol or Ajulemic acid or ECP002A or tetrahydrocannabinol).mp.                  | 54594   |            |
| 4                                              | 1 or 2 or 3                                                                                                                                                                                         | 54594   |            |
| 5                                              | psychotic disorders/ or psychoses, substance-induced/                                                                                                                                               | 48917   |            |
| 6                                              | exp Schizophrenia/                                                                                                                                                                                  | 102001  |            |
| 7                                              | exp "Attention Deficit and Disruptive Behavior Disorders"/                                                                                                                                          | 31325   |            |
| 8                                              | Tics/                                                                                                                                                                                               | 866     |            |
| 9                                              | Tourette Syndrome/                                                                                                                                                                                  | 4203    |            |
| 10                                             | exp Intellectual Disability/                                                                                                                                                                        | 93687   |            |
| 11                                             | Fragile X Syndrome/                                                                                                                                                                                 | 4877    |            |
| 12                                             | exp Child Development Disorders, Pervasive/                                                                                                                                                         | 32767   |            |
| 13                                             | bipolar disorder/                                                                                                                                                                                   | 39203   |            |
| 14                                             | Child Behavior Disorders/                                                                                                                                                                           | 20021   |            |
| 15                                             | Depressive Disorder, Major/                                                                                                                                                                         | 28535   |            |
| 16                                             | Fetal Alcohol Spectrum Disorders/                                                                                                                                                                   | 4056    |            |
| 17                                             | Stress Disorders, Post-Traumatic/                                                                                                                                                                   | 30880   |            |
| 18                                             | exp Anxiety Disorders/                                                                                                                                                                              | 77261   |            |
| 19                                             | (psychosis or psychoses or psychotic or schizophre* or adhd or attention deficit disorder*).mp.                                                                                                     | 231289  |            |
| 20                                             | (tics or tourette* or intellectual development disorder* or intellectual disabilit* or fragile x).mp.                                                                                               | 75871   |            |
| 21                                             | (autism or autistic or Child Behavior?r Disorder* or pervasive development disorder or major depression or f?etal alcohol or post traumatic stress disorder* or posttraumatic stress disorder*).mp. | 122140  |            |
| 22                                             | (anxiety disorder* or severe behavio?ral disturbance* or challenging behavio?r).mp.                                                                                                                 | 49854   |            |
| 23                                             | exp Epilepsy/                                                                                                                                                                                       | 108189  |            |
| 24                                             | exp Seizures/                                                                                                                                                                                       | 61148   |            |
| 25                                             | Multiple Sclerosis/                                                                                                                                                                                 | 50435   |            |
| 26                                             | Chronic Pain/                                                                                                                                                                                       | 12768   |            |
| 27                                             | Muscle Spasticity/                                                                                                                                                                                  | 8832    |            |
| 28                                             | (epilep* or Lennox* or Dravet* or spasticity or cinv or chemotherapy* or chronic pain or multiple sclerosis).mp.                                                                                    | 709152  |            |
| 29                                             | 5 or 6 or 7 or 8 or 9 or 10 or 11 or 12 or 13 or 14 or 15 or 16 or 17 or 18 or 19 or 20 or 21 or 22 or 23 or 24 or 25 or 26 or 27 or 28                                                             | 1283072 |            |
| 30                                             | 4 and 29                                                                                                                                                                                            | 7510    |            |
| 31                                             | limit 30 to (humans and yr="1980 -Current" and "all child (0 to 18 years)" and clinical trial, all)                                                                                                 | 143     |            |

[Execute Searches in Ovid](#)

Search for: limit 30 to yr="1980 -Current"

Results: 25

| EBM Reviews - Cochrane Central Register of Controlled Trials <August 2019> |                                                                                                                                                                                                     |         |            |
|----------------------------------------------------------------------------|-----------------------------------------------------------------------------------------------------------------------------------------------------------------------------------------------------|---------|------------|
| #                                                                          | Search Statement                                                                                                                                                                                    | Results | Annotation |
| 1                                                                          | exp cannabinoids/                                                                                                                                                                                   | 731     |            |
| 2                                                                          | cannabis/                                                                                                                                                                                           | 291     |            |
| 3                                                                          | (cannabi* or hemp* or marijuana* or nabilone or thec* or sativex or dronabinol or Nabiximol* or epidiolex or Levonantradol or Ajulemic acid or ECP002A or tetrahydrocannabinol).mp.                 | 4554    |            |
| 4                                                                          | 1 or 2 or 3                                                                                                                                                                                         | 4554    |            |
| 5                                                                          | exp "Schizophrenia and Disorders with Psychotic Features"/                                                                                                                                          | 8104    |            |
| 6                                                                          | Tic disorders/                                                                                                                                                                                      | 97      |            |
| 7                                                                          | tics/                                                                                                                                                                                               | 61      |            |
| 8                                                                          | Tourette syndrome/                                                                                                                                                                                  | 226     |            |
| 9                                                                          | exp intellectual disability/                                                                                                                                                                        | 1275    |            |
| 10                                                                         | exp Child Development Disorders, Pervasive/                                                                                                                                                         | 1107    |            |
| 11                                                                         | Child behavior disorders/                                                                                                                                                                           | 828     |            |
| 12                                                                         | Stress Disorders, Post-Traumatic/                                                                                                                                                                   | 2215    |            |
| 13                                                                         | exp anxiety disorders/                                                                                                                                                                              | 7964    |            |
| 14                                                                         | exp depression/                                                                                                                                                                                     | 10330   |            |
| 15                                                                         | exp Depressive Disorder/                                                                                                                                                                            | 10814   |            |
| 16                                                                         | exp bipolar disorder/                                                                                                                                                                               | 2399    |            |
| 17                                                                         | Fetal Alcohol Spectrum Disorders/                                                                                                                                                                   | 64      |            |
| 18                                                                         | (psychosis or psychoses or psychotic or schizophre* or adhd or attention deficit disorder*).mp.                                                                                                     | 26645   |            |
| 19                                                                         | (tics or tourette* or intellectual development disorder* or intellectual disabilit* or fragile x).mp.                                                                                               | 2013    |            |
| 20                                                                         | (autism or autistic or Child Behavior?r Disorder* or pervasive development disorder or major depression or f?etal alcohol or post traumatic stress disorder* or posttraumatic stress disorder*).mp. | 15983   |            |
| 21                                                                         | (anxiety disorder* or severe behavio?ral disturbance* or challenging behavio?r).mp.                                                                                                                 | 9728    |            |
| 22                                                                         | exp Epilepsy/                                                                                                                                                                                       | 2725    |            |
| 23                                                                         | muscle spasticity/                                                                                                                                                                                  | 785     |            |
| 24                                                                         | exp multiple sclerosis/                                                                                                                                                                             | 2991    |            |
| 25                                                                         | chronic pain/                                                                                                                                                                                       | 1876    |            |
| 26                                                                         | (epilep* or Lennox* or Dravet* or spasticity or cinv or chemotherapy* or chronic pain or multiple sclerosis).mp.                                                                                    | 99509   |            |
| 27                                                                         | 5 or 6 or 7 or 8 or 9 or 10 or 11 or 12 or 13 or 14 or 15 or 16 or 17 or 18 or 19 or 20 or 21 or 22 or 23 or 24 or 25 or 26                                                                         | 165923  |            |
| 28                                                                         | 4 and 27                                                                                                                                                                                            | 1258    |            |
| 29                                                                         | adolescent/ or child/ or infant/                                                                                                                                                                    | 130670  |            |
| 30                                                                         | 28 and 29                                                                                                                                                                                           | 147     |            |
| 31                                                                         | limit 30 to yr="1980 -Current"                                                                                                                                                                      | 142     |            |

[Execute Searches in Ovid](#)

Search for: limit 29 to (human and "0300 clinical trial" and (childhood or adolescence <13 to 17 years>) and yr="1980 -Current")

Results: 1

| PsycINFO <1806 to September Week 5 2019> |                                                                                                                                                                                    |         |            |
|------------------------------------------|------------------------------------------------------------------------------------------------------------------------------------------------------------------------------------|---------|------------|
| #                                        | Search Statement                                                                                                                                                                   | Results | Annotation |
| 1                                        | exp cannabinoids/                                                                                                                                                                  | 5283    |            |
| 2                                        | exp cannabis/                                                                                                                                                                      | 7912    |            |
| 3                                        | (cannabi* or hemp* or marijuana* or nabilone or the* or sativex or dronabinol or Nabiximol* or epidiolex or Levonantradol or Ajulemic acid or ECP002A or tetrahydrocannabinol).mp. | 25547   |            |
| 4                                        | 1 or 2 or 3                                                                                                                                                                        | 25578   |            |
| 5                                        | exp psychosis/                                                                                                                                                                     | 113480  |            |
| 6                                        | exp schizophrenia/                                                                                                                                                                 | 88619   |            |
| 7                                        | exp attention deficit disorder/                                                                                                                                                    | 26116   |            |
| 8                                        | tics/                                                                                                                                                                              | 1724    |            |
| 9                                        | tourette syndrome/                                                                                                                                                                 | 3082    |            |
| 10                                       | exp intellectual development disorder/                                                                                                                                             | 43900   |            |
| 11                                       | fragile x syndrome/                                                                                                                                                                | 1733    |            |
| 12                                       | exp bipolar disorder/                                                                                                                                                              | 29584   |            |
| 13                                       | exp autism spectrum disorders/                                                                                                                                                     | 41401   |            |
| 14                                       | exp major depression/                                                                                                                                                              | 125391  |            |
| 15                                       | fetal alcohol syndrome/                                                                                                                                                            | 1715    |            |
| 16                                       | exp posttraumatic stress disorder/                                                                                                                                                 | 31398   |            |
| 17                                       | exp anxiety disorders/                                                                                                                                                             | 52309   |            |
| 18                                       | (psychosis or psychoses or psychotic or schizophre* or adhd or attention deficit disorder*).mp.                                                                                    | 213457  |            |
| 19                                       | (tics or tourette* or intellectual development disorder* or intellectual disabilit* or fragile x).mp.                                                                              | 56470   |            |
| 20                                       | (autism or autistic or pervasive development disorder or major depression or fetal alcohol or post traumatic stress disorder* or posttraumatic stress disorder*).mp.               | 215343  |            |
| 21                                       | (anxiety disorder* or severe behavior* or challenging behavior*).mp.                                                                                                               | 52396   |            |
| 22                                       | exp epilepsy/                                                                                                                                                                      | 26722   |            |
| 23                                       | exp seizures/                                                                                                                                                                      | 15796   |            |
| 24                                       | multiple sclerosis/                                                                                                                                                                | 12431   |            |
| 25                                       | chronic pain/                                                                                                                                                                      | 12873   |            |
| 26                                       | chemotherapy/                                                                                                                                                                      | 2925    |            |
| 27                                       | (epilep* or Lennox* or Dravet* or spasticity or cinv or chemotherapy* or chronic pain or multiple sclerosis).mp.                                                                   | 85323   |            |
| 28                                       | 5 or 6 or 7 or 8 or 9 or 10 or 11 or 12 or 13 or 14 or 15 or 16 or 17 or 18 or 19 or 20 or 21 or 22 or 23 or 24 or 25 or 26 or 27                                                  | 608284  |            |
| 29                                       | 4 and 28                                                                                                                                                                           | 5177    |            |
| 30                                       | limit 29 to (human and "0300 clinical trial" and (childhood <birth to 12 years> or adolescence <13 to 17 years>) and yr="1980 -Current")                                           | 24      |            |

[Execute Searches in Ovid](#)
