# Supplementary material for: Efficacy of cannabinoids in neurodevelopmental and neuropsychiatric disorders among children and adolescents: a systematic review
Source: Eur Child Adolesc Psychiatry. 2023 Mar 3;33(2):505–26. doi: 10.1007/s00787-023-02169-w (PMC10869397; doi:10.1007/s00787-023-02169-w)
Supplement: Supplementary file 2 — Supplementary file2 (XLSX 62 kb) [file 787_2023_2169_MOESM2_ESM.xlsx]

## Sheet: Title
Supplementary Material 2
Article:	Efficacy of cannabinoids in neurodevelopmental and neuropsychiatric disorders among children and adolescents: a systematic review
Journal:	European Child & Adolescent Psychiatry
Authors:	Lauren J. Rice1,2, Lisa Cannon1,3, Navin Dadlani4, Melissa Cheung1,2, Stewart L. Einfeld4, Daryl Efron5,6, David R. Dossetor2, Elizabeth J. Elliott1,2
Affiliation:	1 The University of Sydney, Faculty of Medicine and Health, Specialty of Child and Adolescent Health, Sydney, New South Wales, Australia
	2 Sydney Children’s Hospitals Network, Kids Research
	3 Telethon Kids Institute, Perth Children’s Hospital, Perth, Western Australia, Australia
	4 The University of Sydney, Faculty of Medicine and Health, Brain and Mind Centre, Sydney, New South Wales, Australia
	5 Health Services, Murdoch Children’s Research Institute, Department of General Paediatrics, Royal Children's Hospital
	6 University of Melbourne, Department of Paediatrics
Correspondence:	Lauren Rice, lauren.rice@sydney.edu.au

## Sheet: Content
Content
Data Extraction
	Table S1	Detailed Data Extraction for each paper, sorted by condition.
Risk of Bias and Trial Quality
	Table S2.	Joanna Briggs Institute (JBI) Critical Appraisal Checklist for Case Reports
	Table S3.	National Institute of Health (NIH) Quality Assessment Tool for case series
	Table S4.	National Institute of Health (NIH) Quality Assessment Tool for Before-After (Pre-Post) Studies with No Control Group
	Table S5.	Risk of Bias for Randomised Trial (ROB2)
Clinical Trials Underway
	Table S6.	Clinical trials in progress for studies of cannabinoid-based products (CBP) in the treatment of psychiatric and neurodevelopmental disorders in children and adolescents*
References

## Sheet: Table S1 - Data Extraction
Condition	Author	Aim	Country*	Study Design	Study Duration	Participants N; (% male); Age	Other/Secondary Conditions	Drug	Cannabinoid Drug Supplier	Administration & Dosage	Measures	Results	Clinical Summary	Completion Rate & Reasons for Termination	Concomitant medication	Adverse events	Adverse events (detail)	Safety summary
Anxiety Disorders	Klier et al	Present a case with comorbid anxiety disorders (and Crohn’s disease) who was treated with CBD for 26 weeks	Austria	Case report	26 weeks	N=1 (0%); 14	Crohn’s disease	CBD oral capsules	“Pharmacy of the hospital”	Initial dose: 100 mg/day. Increased continually to 600 mg over 19 weeks.	Clinical Global Impression Severity Scale (CGI-S), DSM-5 and Behavioural changes.	CGI-S score improved - decreased from 5 (high) to 3 (mildly ill). Still met the DSM-V diagnostic criteria for specific phobia and social phobia, but at a much less intensity (e.g., now able to undertake necessary medical procedures; use public transport). Still had incidents of marked anxiety when faced with unfamiliar situations.	Suggests CBD might improve severity of symptoms and some behaviours, but not remission.	Case completed treatment with CBD for 26 weeks.	monoclonal antibody (started adalimumab; changed to ustekinumab).	Unknown	Not reported	Safety not mentioned
Anxiety Disorders	(Also see Laczkovics et al, under ‘Mood Disorders’)
ASD	Aran et al	Evaluate the safety and efficacy of cannabidiol-rich cannabis in children with ASD and severe behavioural problems	Israel	Retrospective before and after study with no control group	10 months	N=60 (83%); 5-17	All participants had severe behaviour problems	Whole plant extracts dissolved in olive oil. CBD and THC (initial ratio of 20:1). Variability in the strain and dose across participants.	CHP, ™Better, Israel; Avidekel, Tikun Olam Ltd, Israel; Topaz BOL Pharma, Israel.	Adjuvant therapy, given sublingual 2-3 times a day (with doses up-titrated over 2–4 weeks). Starting dose = 1 mg/kg/day; maximal dose = 10 mg/kg/day. Mean total daily dose: a) 3 daily doses (n=44): 3.8 ± 2.6 mg/kg/day CBD and 0.29 ± 0.22 mg/kg/day THC; b) 2 daily doses (n=16): 1.8 ± 1.6 mg/kg/day CBD and 0.22 ± 0.14 mg/kg/day THC. Note: 29 patients with insufficient response tried a lower CBD:THC…	Parent/Caregiver questionnaires pre- & post-intervention: Caregiver Global Impression of Change (CGIC) scale; Home Situations Questionnaire–autism spectrum disorder (HSQ-ASD); Autism Parenting Stress Index (APSI).	Total Sample (n=57): CGIC scale improved: 61% behaviour, 39% anxiety, 47% communication; HSQ-ASD score improved by 29%; APSI score improved by 33%. Idiopathic ASD subgroup (n=39): CGIC scale improved: 77% behaviour, 51% anxiety, 60% communication.	Suggests that CBD and THC (20:1) might improve core ASD symptoms in some children with ASD (communication and anxiety) and severe behaviour problems. Positive responses were slightly higher when examined only in participants with idiopathic ASD.	44 children (73%) completed. 16 children (27%) dropped out of the trial due to: marked irritability (2), unsuccessful attempts to give the oil (1), low efficacy (5), a combination of low efficacy and side effects (7) and a transient psychotic event (1).	In total 49 (82%) treated with concomitant medication, including: antipsychotics (n=43; 72%); mood stabilizers (n=10; 17%); benzodiazepines (n=7; 12%); SSRIs (n=4; 7%); stimulants (n=4; 7%). Following cannabis treatment: 12 (24%) stopped taking medications; 16 (33%) received fewer medications/lower dosage; and 4 (8%) received more medications/higher dose.	Yes	Any adverse event (29; 51%). Included: Sleep disturbance (8; 14%) (Usually resolved by omitting or adjusting the evening dose); Restlessness (5; 9%); Nervousness (5; 9%); Loss of appetite (5; 9%); Gastrointestinal symptoms (4; 7%); Unexplained laugh (4; 7%); Mood change (3; 5%); Fatigue (3; 5%); Nocturnal enuresis (2; 3.5%); Gain of appetite (2; 3.5%); Weight loss (2; 3.5%); Weight gain (2; 3.5%)…	Unclear how many participants experienced more than one adverse event. Strains with high dose of THC might cause severe psychotic episode.
ASD	Bar-Lev Schleider et al	Characterize the patient population receiving medical cannabis treatment for autism and evaluate the safety and efficacy of this therapy	Israel	Prospective before and after study with no control group	6 months	N=188 (82%); ≤18	Epilepsy, ADHD	CBD and THC (20:1). 94.7% of the patients: cannabis oil (extract of a high CBD strain dissolve in olive oil; 30% CBD & 1.5% THC) applied under the tongue; 7 (3.7%) oil and inflorescence; 3 (1.5%) only inflorescence.	N/A	Initial dose: 1 sublingual drop 3 times/day with one oil drop (0.05 ml) containing 15 mg CBD and 0.75 mg THC. Participants who had high sensitivity to previously used medications started with 15% CBD and 0.75% THC. Participants with severe sleep disturbances received additional 3% THC oil to their evening dose; Participants with aggressive/violent behaviour received additional 3% THC oil. Mean do…	a) medical questionnaire completed by the nurse interviewing parents (included the following domains: demographics, comorbidities, habits, concomitant medications, measurements of QoL and a detailed symptoms checklist); b) Parent’s global assessment of their child; c) Autism symptoms severity assessment (e.g. restlessness, rage attacks, agitation, speech impairment, cognitive impairment, anxiety,…	Baseline: parents of n=188 patients reported Mean 6.3 (± 3.2) symptoms. *Child global assessment: Overall, >80% of parents reported a significant/ moderate improvement. At 1 month follow-up, 17 (14.3%) reported that the cannabis did not help them. At 6 months follow-up 8 (8.6%) had no change in their condition. *QoL: significant improvements from prior to treatment to 6 months follow-up in, a) go…	This study suggests cannabis treatment may improve a range of symptoms (e.g., seizures, tics, depression, restlessness, and rage attacks), and quality of life for individuals with ASD.	1 month follow-up (n=188): 8 (4.2%) stopped treatment; 1 (0.5%) switched to a different cannabis supplier; and 179 (94.6%) continued treatment. 6-month follow-up (n=179): 15 (8.3%) stopped treatment; 9 (4.9%) switched to a different cannabis supplier; and 155 (86.6%) continued treatment. Discontinued treatment (n=23): 17 (73.9%) provide reasons for discontinuation: no therapeutic effect (n=12; 70…	The most common concomitant chronic medications at intake: antipsychotics (56.9%); antiepileptics (26.0%); hypnotics and sedatives (14.9%); and antidepressants (10.6%). 67 (72%) of the 93 participants who responded to the follow-up questionnaire, reported use of chronic medications at intake. Of which, 38 reported their drug consumption stayed the same, 6 reported an increase, and 23 reported a d…	Yes	One month follow-up: 7 out of 199 (i.e. 5.9%) experienced adverse effects; sleepiness (2; 1.6%); bad taste and smell of the oil (2; 1.6%); restlessness (1; 0.8%); reflux (1; 0.8%); lack of appetite (1; 0.8%). 6 month follow up: most common side effects reported by 23 participants (25.2%, with at least one side effect) were: restlessness (6; 6.6%); sleepiness (3; 3.2%); psychoactive effect (3; 3.2…	Cannabis appears to be well-tolerated and safe treatment for ASD. The adverse effects reported by the patients and parents were moderate and relatively easy to cope with. High level of compliance (<15% stopped treatment at 6 months follow-up; and <5% stopped treatment due to adverse events). Suggests a careful titration schedule is important to maintain a low adverse effects rate and increase the…
ASD	Fleury-Teixeira et al	Analyse the effects of the compassionate use of CE given to ASD patients	Brazil	Prospective before and after study with no control group	6 months (n=1); 9 months (n=14)	N=18 (72%); 6-17	Epilepsy	CBD-enriched Cannabis sativa extract (CE). CBD and THC (75:1). Oral capsules containing 25 or 50 mg of CBD and ∼0.34 or 0.68 mg of THC	CBDRx, Colorado, USA.	Administration: 2 times/day. Mean initial dose of CBD: ∼2.90 mg/kg/day (2.30 -3.60 mg/kg/day). Intensive dosage adjustments during the first 30 days, and more sparsely over the next 150 days. During study, all patients received a mean CBD dose of 4.55 mg/kg/day (3.75 - 6.45 mg/kg/day) and mean THC dose of 0.06 mg/kg/day (0.05 - 0.09 mg/kg/day).	Parent/Caregiver questionnaire at baseline and monthly regarding perceived changes in 8 symptom categories: 1) ADHD, 2)Behavioural Disorders (BD), 3)Motor Deficits (MD), 4)Autonomy Deficits (AD), 5)Communication & Social Interaction Deficits (CSID), 6)Cognitive Deficits (CD), 7)Sleep Disorders (SD), 8)Seizures (SZ).	14/15 patients (93%) showed improvements ≥30% in at least 1 of the 8 symptom categories; with 7 patients (47%) showing improvements ≥30% in ≥4 categories. (Based on symptom categories: at least 60% of patients showed improvements of ≥20% in ADHD, MD, CSID, SD, and SZ). 1 patient (receiving multiple neuropsychiatric medications) presented with overall maintenance/worsening of symptoms. 8/10 patien…	Suggests CBD and THC (75:1) might improve multiple ASD symptoms of children with ASD (including epileptic and non-epileptic patients) - particularly ADHD, SD and SZ; and without the typical side effects found in medicated ASD patients. Also suggests improvements continue after reducing/discontinuing other medications.	n=3 (of the 18) discontinued treatment in the first month due to the occurrence of adverse effects (including: insomnia, irritability, increased heart rate, and worsening of psycho-behavioural crisis). They were not included in analysis. Adverse effects may have been due to concomitant medication.	11 of the 15 participants were also concomitantly taking other prescribed neuropsychiatric medications: Risperidone in combination with other medications (n=7) (Melatonin; Promethazine; Carbamazepine; Oxcarbazepine; Levomepromazine + Oxcarbazepine; Oxcarbazepine + Levetiracetam + Topiramate + Valproate semisodium). Others included: Phenobarbital (n=1); Lamotrigine + Topiramate (n=1). Two were not…	Yes	Mild and/or transient adverse effects that were reported among the 15 patients: sleepiness (3), moderate irritability (3); diarrhoea (1), increased appetite (1), conjunctival hyperemia (1) increased body temperature (1) and nocturia (2). One experienced significant worsening in psycho-behavioural aspects. Possible Drug-Drug-interaction: those who experienced relevant side effects were all receivi…	Suggests non-epileptic patients had fewer adverse effects compared to currently available therapies. Not all benefited equally from the treatment, with those receiving concomitant medication (including at least one antipsychotic) reported negative results (n=4/18) – suggesting possible undesirable drug interactions and potential risk when CE is used in a drug combination. Suggests gradual increas…
ASD	Kurz & Blaas	Investigate whether dronabinol (∆-9-THC) could safety be used in autism and what outcomes can be achieved within 6 months	Austria	Case report	6 months	N=1 (100%); 6	No other condition mentioned	THC Dronabinol drops (dronabinol solved in sesame oil)	N/A	Initial dosage was one drop (0.62 mg) in the morning. Gradually increased day to day. Maximum tolerated dose effect: 3 times/day (2 drops in the morning, 1 drop at midday and 3 drops in the evening), a total daily dose of 3.62 mg dronabinol.	Aberrant Behaviour Checklist (ABC) questionnaire completed by an examiner together with parents at beginning and end of study; 5 subscales: hyperactivity, lethargy, stereotype, irritability, and inappropriate speech.	ABC subscales significantly changed over 6 months, with improvements in hyperactivity, lethargy, irritability stereotype, and inappropriate speech (decrease by: 27, 25, 12, 7 points; and improved by 6 points respectively).	Suggests THC improves hyperactivity, lethargy, stereotype, irritability, and inappropriate speech of a child with ASD. THC may be an effective additional support (with CBT) and be better tolerated than many antipsychotic drugs.	Case completed the 6-month treatment	None	No	No side effects were reported by parents during treatment	Larger controlled studies needed to explore the safety of THC
ASD	Ponton et al	Describe the novel use of a CBD-based extract on a patient with ASD	Canada	Case report	2 years & 5 months	N=1 (100%); 15	Selective mutism, anxiety, and controlled epilepsy.	Cannabinoid extracts. CBE (60mL bottle of 1:20 CBE (0.001% THC, 0.02% CBD), with olive oil carrier).	CanniMed	Initial dose: 0.1mL 2 times/day (2 mg CBD and 0.1 mg THC). After 3 months, increased the dose to 0.2mL 2 times/day (4 mg CBD and 0.2 mg THC).	Completed by mother: Visual analog scale (VAS) - overall anxiety, social anxiety, aggressiveness, irritability, talkativeness, concentration; Children’s Sleep Habits Questionnaire (CSHQ). Completed by participant: Adult Autism Spectrum Quotient Score (AQ).	Partial response at the initial dose of 0.1 mL twice a day and a dramatic response at 0.2 mL twice a day. Improvement at 9-month follow-up in all 6 VAS areas. At 2 years 5 months had a normal AQ score of 10/50; and improvements in anxiety, behavioural symptoms, social deficits and sleep were maintained (e.g. conversations with acquaintances; more motivated/energetic, lost weight (was overweight),…	Suggests CBE improves social communicative and behavioural ASD symptoms, anxiety, sleep dysregulation and weight; and at a lower dose than previously studied. – These improvements could lead to improved daily functioning and better QoL.	Case started CBE in 2017, continued until at least Feb 2020.	Initially prescribed: carbamazepine for seizures followed by clobazam and valproic acid (VPA), each stopped in 2015, 2016 and 2017 respectively, due to side effects. At time of CBE initiation: lamotrigine for seizures (200 mg twice/day); lorazepam for breakthrough seizures (1 mg sublingual/ buccal as necessary); melatonin for sleep initiation (6 mg); riboflavin (400 mg orally once/day); magnesium…	No	Feb 2020: No side effects were reported (nausea/vomiting, diarrhoea, headaches, euphoria, feeling high, anxiety, panic attacks, palpitations, somnolence during the day or drowsiness).	No side effects reported. Rigorous, controlled clinical trials are needed to further establish safety, especially long-term safety, optimal dosing, and efficacy, including further delineation of the effect of CBE on core versus associated ASD symptoms.
FASD	Koren et al	Analyse the effect of cannabis in children and young adults diagnosed with FASD	Israel	Case series	2 years; N/A	N=2 (100%); 5yrs + 4months, 12	Several conditions associated with FASD (e.g., ADHD, conduct disorder, learning disability)	CBD and THC. CBD oil (5yo: 20% CBD, 0.2% THC; 12yo: 15% CBD, 1% of THC)	N/A	5yo: two oil drops. 12yo: three morning drops	The parent version of the Nisonger Child Behavior Rating Form (NCBRF) - a visual analog scale (VAS) for disruptive symptoms.	5yo: marked change in behaviour. Tantrum attacks reduced (≤1 a day), disappearances reduced, aggressiveness toward other children stopped, communicates feelings more clearly. 12yo: marked reduction in aggressiveness, restlessness, and impulsivity.	Suggests CBD oil may improve disruptive symptoms such as aggression and impulsivity, of children with FASD.	All cases completed.	5yo: He did not receive any antipsychotic drug while taking CBD. 12yo: Risperidone and maybe methylphenidate. CBD treatment allowed to cancel the plan to increase the dose of risperidone.	No	Both did not experience serious adverse drug reactions. The parents did not report on adverse effects and did not detect tolerance over time.	A well-controlled study is needed to explore the safety of CBD. CBD as a pharmacological solution for disruptive behaviour may be advantageous, as second-generation antipsychotic drugs have risk of adverse effects (CNS effects, weight gain, complex metabolic changes).
FXS	Heussler et al	Evaluate the safety, tolerability, and initial efficacy of a transdermal CBD gel (ZYN002) in a paediatric population with FXS	Australia	Open-label multi-site trial	12 weeks	N=20 (75%); 6-17	Anxiety, ADHD, sleep disorders. (Exclusion criteria included any acute or progressive neurological disorder, psychosis, schizophrenia, psychiatric disorder, or severe mental abnormalities other than FXS).	CBD Transdermal Gel (ZYN002)	Zynerba Pharmaceuticals	Adjunct to their existing treatments. 6-week titration period, followed by a 6-week maintenance period. Administration: 2 times/day. Three dosage levels: 50 mg once a day (dose A); 50 mg twice a day (i.e., 100 mg/day; Dose B); or 125 mg twice a day (i.e. 250 mg/day; Dose C). Increases in dose level determined in the 6-week titration period, based on assessment of tolerability, clinical response (…	Anxiety, Depression, and Mood Scale (ADAMS); The Aberrant Behavior Checklist—Community for FXS (ABC-CFXS) (parent/caregiver assessment of maladaptive behavior. Domains: social avoidance, stereotypic behavior, lethargy, irritability, hyperactivity, and inappropriate speech); The Pediatric Anxiety Rating Scale (PARS-R) (Domains: number, frequency, and severity of anxiety symptoms; severity of physi…	Statistically significant 12-week improvements. Including: a) ADAMS total score (and manic/hyperactivity behaviour, social avoidance, general anxiety and compulsive behaviour subscales); b) social avoidance, stereotypy, socially unresponsive/lethargic, Irritability, Hyperactivity, and Inappropriate speech (ABC-CFXS); c) PARS-R; d) PedsQL total score (and psychosocial health and emotional function…	Suggests CBD Transdermal Gel may result in statistically significant reduction in anxiety, emotional and behavioural symptoms for children and adolescents with FXS.	n=2/20 (11%) were down titrated to 100 mg (dose B) due to psychomotor hyperactivity (n=1) and adverse event of stereotypy (n=1). n=2 discontinued treatment: on day 63 (100 mg daily; dose B, due to an adverse event - worsening of pre-existing eczema) (n=1); and on day 64 (50 mg daily; dose A - withdrew consent for administrative reasons, and was a sibling of the other patient who withdrew). 18/20 …	Not reported	Yes	17/20 (85%) reported ≥1 treatment-emergent adverse event during the 12-week treatment phase. 6/20 (30%) patients experienced ≥1 adverse event considered possibly/probably related to treatment (e.g. application site disorders (n=2)). No serious adverse events were reported. Adverse events included: Gastroenteritis (5); Vomiting (2); Upper respiratory tract infection (2); Mouth ulceration (1); Para…	Majority (70%) of adverse events were mild and resolved by the end of the 12-week treatment period. Results suggest ZYN002 CBD gel is clinically safe (and tolerated) for the treatment of FXS patients.
FXS	Tartaglia et al	Present the cases of one child and two adults with FXS who were treated with various oral botanical CBD+ solutions	USA	Case report (one eligible participant in case series of n=3)	~1 year 3 months	N=1 (100%); 3yrs + 6 months	No other conditions mentioned	CBD and THC. Oral paste (18%-23.5% CBD and trace amounts (0.03%) of THC).	RSHO Blue Label; Naturewell, Inc., San Diego, CA	Dosage: 50 mg of CBD/day at 15-30 months old and reinitiating 50 mg of CBD/day at 3 years old. Parents combined the CBD paste with coconut oil, heated the mixture until liquefied. Used a syringe to administer orally.	Parental observations (and confirmation from patient’s occupational and speech therapists - some were unaware of the initiation of CBD+ treatment); Vineland adaptive behaviour scales (VABS) - at 1 year and 4 months; and 3 years of age	Considerable improvements in a range of clinical parameters (e.g., feeding, weight gain, oral-motor coordination, motor skills, vocalisation and language skills, willingness to explore new places; decrease in: self-stimulatory behaviour, social avoidance, sensory sensitivities, and hyperactivity) – many observations confirmed by child’s occupational and speech therapists. Adaptive functioning sco…	Suggests CBD may provide therapeutic effects for children with FXS (e.g. language, social and motor skills, anxiety, sleep, adaptive function).	CBD treatment up until 30 months of age (at which time his parents chose to discontinue the CBD + treatment to explore minocycline). At 3 years of age patient was restarted on CBD + treatment (50mg/day).	Up until 3 months follow-up: CBD+ solution was the only medication used in treatment. 4-month follow up: The patient began a regimen of sertraline (2.5 mg/day). 30 months of age: discontinue CBD+ treatment, and began minocycline (25mg). 3 years of age: sertraline (4mg/day) and minocycline (25mg/day). Re-initiation of CBD+ treatment: restarted on CBD+ treatment (50mg/day).	No	No observed adverse effects	Suggests CBD is generally well tolerated among individuals with FXS. Open-label trials and placebo-controlled trials should be conducted.
ID	Efron et al	Investigate the feasibility of conducting a RCT of CBD to reduce severe behavioural problems in children with ID	Australia	RCT	8 weeks	N=8 (a: 63%; b:58.3%); 8-16	ASD, ADHD, epilepsy, tics, obsessive compulsive, anxiety, depression	CBD oral solution: 98% CBD 100 mg/ml in grapeseed oil	Tilray, Canada	Initial dose: 5 mg/kg/day in 2 divided doses (matched dosing in the placebo group). Dose increased in increments of 5 mg/kg every 3 days for 9 days up to the maintenance dose of 20 mg/kg/day. Participants weighing ≥50kg: a ceiling dose of 1000 mg/day.	Aberrant Behaviour Checklist (ABC-I) (5 subscales: Irritability; social withdrawal; stereotypic behaviour; hyperactivity/non-compliance; inappropriate speech); Child & Adolescent Scale of Participation (CASP) (measure of participation in home, school, and community activities); Child Health Utility 9D (CHU9D) (quality adjusted life years for children); Sleep Disturbance Scale for Children (SDSC) …	Greater improvements for CBD group, with all 3 within CBD group reporting a significant change in behaviour vs 0/4 in the placebo group. (E.g., ABC-I mean reduction = 12 points compared with 2.5 points).	Suggests CBD may significantly improve behaviour in children with ID compared to a placebo.	N=8 (100%) completed medication protocol, study visit attendance (4 per participant), and acceptable medication adherence (>80% considered acceptable). 92% completion for blood tests (3 per participant) and 88% completion for parental online questionnaire.	Medication (Treatment group (n=4) /comparison group (n=4)) included: Risperidone (2/1); Fluoxetine (1/2); Methylphenidate (0/1); Clonidine (1/1); Guanfacine (1/0); Sodium valproate (0/1); Melatonin (1/1).	Yes	No severe adverse events. No information provided to state if any participants experienced no side effects. Symptoms for which parents reported a 2-point increase on the Monitoring of Side Effects Scale (MOSES) from baseline to day 66 (treatment group/comparison group): Eyes rolled up (1/0); Tics/grimace (1/0); Ear ringing (1/0); Headache (0/1); Drooling/pooling (1/0); Nose congestion/running nos…	Suggests CBD is feasible and acceptable for patients with ID and severe behavioural problems and their families. Proposes future research develop a specific measure that succinctly focuses on common adverse events seen with CBD (MOSES was suboptimal for this study).
Mood Disorders	Gruber et al	Present 5 cases in which the evidence seems clear that marijuana produced a direct antidepressant effect.	USA	Case report (one eligible participant in case series of n=5)	Started in 8th grade	N=1 (100%); 16	16yo was hospitalised for their first episode of major depression and had a history of dysthymia and ADHD.	marijuana	N/A	Initially used 1-2 times a week with friends; soon begun to use it daily 'to improve his mood'.	Self-reporting (retrospective).	History of dysthymia and ADHD and hospitalised for his first episode of major depression. Reported an increase in depressive symptoms when unable to use marijuana. (While hospitalised had a strong desire for marijuana). Reported only partial relief of symptoms with fluoxetine. Reported full relief with marijuana when he was able to use it.	Suggests marijuana may provide relief of depressive symptoms and may be more effective than traditional antidepressants (e.g., fluoxetine).	Case completed the study.	Fluoxetine, 20 mg/day (reported only partial relief of his depressive symptoms with fluoxetine)	Unknown	Not reported	Adverse effects not mentioned.
Mood Disorders	Laczkovics et al	Present a case with severe depression and other conditions/disorders who was administered CBD capsules for over 6 months	Austria	Case report	>6 months	N=1 (100%); 16.9	Multiple substance use disorders, social phobia, narcissistic personality disorder	CBD oral capsules	N/A	initial dose: 50 mg twice daily (morning and evening). Within 3 weeks, increased the dosage gradually to 300 mg twice daily (i.e., 600 mg/day).	German version of the Wechsler Adult Intelligence Scale (WAIS) (baseline); Beck Depression Inventory II (BDI-II) (baseline, week 4, week 8); German version of the Fear Survey Schedule for Children—Revised (FSSC-R); and short screening Checklist of the Early Recognition Inventory (ERIraos) (both at baseline and week 8).	Improvements in depressive, anxiety scores and reduced risk of psychosis from baseline to follow-up. Depressive score: 22, 10 to 7; anxiety raw score: 52 to 31 (including social anxiety: 13 to 7); and risk of psychosis scores: 12 to 4 (including mental disorder [affective symptoms, withdrawal, school and sleep problems]: 4 to 0). – However, improvement in psychosis and dissociative symptoms may b…	Suggests CBD capsules improve depressive and anxiety symptoms (especially social anxiety and withdrawal), even after the cessation of antidepressant medication.	Case completed treatment with CBD for over 6 months	Sertraline, 100 mg/day, orally (for social anxiety and depressive mood) - discontinued after 3 weeks of CBD treatment (at patients request).	No	The patient reported no adverse effects. No side effects regarding heart rate, blood pressure, and weight. No difference in mood and anxiety symptoms (after cessation of Sertraline). No withdrawal symptoms (after cessation of illegal drugs, including THC).	Safe, well tolerated and good adherence.
PTSD	Bolsoni et al	Assess the effects of a 7-day oral treatment with CBD on the reconsolidation of memories related to the traumatic event (acute sexual violence)	Brazil	Case report	7 days	N=1 (0%); 15	No other conditions mentioned	CBD oral capsules (CBD powder: 99.9% purity dissolved in corn oil)	BioSynthesis Pharma Group, Sandwich, UK	A single dose of 300 mg/day, started on day 2 before the behavioural test and continued daily for 6 additional days.	Demographics, State-Trait Anxiety Inventory (STAI-T [Trait] and STAI-S [State]); Patient Health Questionnaire-9 (PHQ-9); Mini-Screening of Mental Disorders (Mini-SMD); if results of the Mini-SMD were positive - Structured Clinical Interview for DSM-V (SCID-5-Clinical Version); cortisol awakening response tests (CAR test); Posttraumatic Stress Disorder Checklist-5 (PCL-5); behavior test 1 (reporti…	Initial dose of CBD did not prevent an increase in anxiety after recollection of the event. Anxiety did not increase when re-exposed to the account of the event 1 week after administering CBD for 7 days. Depressive symptoms increased (0 to 20) in the first two weeks of the study (PHQ-9). Met DSM-V criteria for acute stress disorder (day 30) and PTSD (day 60).	Suggests CBD may not prevent an increase in anxiety after recollection of a traumatic event or prevent the development of PTSD; but it may interfere with the reconsolidation of traumatic memories.	Case completed the study.	Sertraline (for depression)	Unknown	Not reported	Adverse effects not mentioned.
PTSD	Lorenz et al	Discuss the application of ∆-9-THC in 8 child case studies suffering from various conditions	Germany	Case report	N/A; 3 months	N=2 (50%); 3yrs + 10 months, 11	Eating disorder (associated with PTSD)	THC oral	Dronabinol, Marinol	3 yo: brief course using 1 mg THC/day. 11 yo: 0.09–0.12 mg THC/kg/day in two doses.	Parental and clinical subjective reporting	11yo: prior to treatment had an eating disorder. During treatment vomiting decreased, was hungry, ate and drank more, consistent weight, more accessible, “emerged from her previously destructive attitude”, eye contact, felt happier, a higher level of associative thinking and verbal disinhibition (sexual contents). After discontinuing THC, body weight remained stable, and mood improved. 3yo: “…goo…	Suggests THC may improve posttraumatic reactions (and possibly eating disorders) among children. Optimal THC dose likely to depend on patient’s indication.	‘in several cases treatment was discontinued’ (paper does not specify which of the 8 cases this referred to) – no sign of withdrawal from those who discontinued treatment.	Not reported	No	None mentioned for both cases. 11yo: no symptoms of withdrawal after 3 months treatment was stopped.	Adverse effects of THC in children differs to those in adults.
PTSD	Shannon et al	Provide evidence that CBD is effective as a safe alternative treatment to traditional psychiatric medications for reducing anxiety and insomnia secondary to PTSD	USA	Case report	5 months	N=1 (0%); 10	Anxiety, insomnia, outbursts at school, suicidal ideation, and self-destructive behaviours (secondary to PTSD)	CBD oil (capsule) and CBD liquid (sublingual spray)	N/A	25 mg/day (i.e. 1 capsule) at 6pm; and 6-12 mg of CBD sublingual spray (i.e. 2-4 sprays) during the day (as needed for anxiety; typically between 2 or 3 times/week).	Sleep disturbance scale for children (SDSC); and Screen for anxiety related disorders (SCARED) - administered before taking CBD oil, and each month afterwards for the next 5 months.	Sleep and anxiety consistently and steadily improved over the 5 months. Child was able to sleep in own room, less anxious at school and home, displayed appropriate behaviours.	Suggests CBD oil can reduce anxiety and insomnia as part of PTSD among children.	Case completed the study.	Initial treatment (Jan 2015) to assist with her sleep and anxiety: melatonin (5 mg/night); magnesium (300 mg/day); and diphenhydramine (Benadryl; 25 mg/night). CBD as a potential additional treatment was deferred for 2 months, as caregiver preferred to reduce the pharmacologic load. When CBD treatment begun, patient received diphenhydramine (25mg/night) and nutritional supplements.	No	Patient did not report any complaints or discomfort from using CBD. (Researchers routinely asked about headache, fatigue, and change in appetite or agitation in addition to conducting a routine psychiatric evaluation).	Suggests CBD oil is generally safe with minimal side effects. Long-term effects are yet to be studied.
TS	Hasan et al	Examine the clinical effects of ∆-9-THC as an add-on treatment in an adolescent experiencing severe TS plus ADHD treated with stimulants	Germany	Case report	9 weeks	N=1 (100%); 15	ADHD	THC (∆-9 THC)	N/A	Initial dose: 5 mg in the morning. Increased during the following 9 weeks. The dose of ∆9-THC was increased up to 15 mg/day within the first 3 weeks.	Short-interval intracortical inhibition (SICI) compared to test pulse (%); cortical silent period (CSP) inhibition ms; Yale Global Tic Severity Scale (YGTSS); Conners’ Teacher Rating Scale (CTRS-R:L); the Gilles de la Tourette Syndrome- Quality of Life Scale (GTS-QOL)	At week 7, severity of tics reduced (YGTSS) and improvement in QoL (GTS-QoL). After week 8, had a slight decrease in ADHD symptoms (but still severe impairment by hyperkinetic and inattentive symptoms; CTRS-R:L). Stimulant add-on treatment (methylphenidate) was initiated, resulted in further decrease in CTRS-R:L score without any increase of tics or inner tension as observed before the THC treatm…	Suggests THC might be an effective treatment or add-on therapy for adolescents with severe TS, who do not respond to neuroleptics alone.	Case completed the study.	Dosages of concomitant aripiprazole (10-10-10 mg/d tid) and risperidone (1-1-1 mg/d tid) were kept constant throughout the 9 weeks. Stimulant add-on treatment: methylphenidate (30 mg/day) was administered after 8 weeks.	No	The patient reported no adverse effects including ratings on the Positive and Negative Syndrome Scale. Described a mild transient euphoria after the first ∆9-THC intake. The patient benefited from the add-on of methylphenidate without adverse effects only after successful treatment with ∆9-THC.	Suggests THC might improve TS with limited adverse effects; and might be an effective add-on therapy to prevent tic-exacerbations in those taking neuroleptics and stimulants.
TS	Jakubovski & Muller-Vahl	Examine the improvement in speech fluency, social impairment, and patients’ quality of life different cannabis-based medicines have on two cases of TS patients (suffered from disabling vocal blocking tics and palilalia)	Germany	Case report (one eligible participant in case series of n=2)	1 year (& 8 months after 1 year)	N=1 (100%); 16	Comorbid symptoms (e.g., anxiety, depressed mood, rage attacks, sleeping problems, social problems/withdrawal, and obsessive-compulsive symptoms).	CBC and THC. 16yo: vaporized dronabinol. 19yo: vaporized medical cannabis containing 22% THC and 1% CBD.	N/A	Initially up to a maximum dose of 3x8 drops daily (=16.8 mg dronabinol. 1 drop=0.7 mg dronabinol); at 1 year, restarted at a max dose of 8-12 drops 4 times/day (=22.4-33.6 mg dronabinol).	clinical observations and participants reported improvement.	Improvement with only minimal vocal blocking tics, more fluent speech, and improved (but still present) motor tics (e.g., head jerks, blocking of movements). Also, improvement in impulsive behaviours, rage attacks, anxiety, OCS, academic performance, and social withdrawal. Experienced relapse due to noncompliance, benefits returned when treatment resumed (e.g., ~70% improvement in overall tics, a…	Suggests CBD (medical cannabis or dronabinol) may improve simple and complex motor and vocal tics; overall symptomology associated with TS, including comorbid conditions, and improve QoL of individuals with treatment-resistant TS.	stopped dronabinol at 1 year follow-up, but restarted after 1 year follow-up for another 8 months.	Not reported	No	No-side effects.	No severe side effects reported.
TS	Muller-Vahl et al	Cannabinoids: possible role in pathophysiology and therapy of Gilles de la Tourette syndrome	Germany	Case series	N/A; > 3years	N=2 (100%); 16, 18	Mild/moderate obsessive-compulsive symptoms, ADHD	marijuana cigarettes	N/A	16yo: 1-2 cigarettes/week, occasionally. 18yo: 5-6 cigarettes/week, regularly.	Structured interview (use of marijuana, frequency and duration of use, the number of drugs used, and the influence on tics and behavioural disorders). A physical and neurological examination (to exclude other disorders). Comorbid diagnoses of Obsessive-compulsive symptoms (OCS) and ADHD, and tic severity according to the Shapiro TS Severity Scale (STSS).	Marijuana produced moderate/marked reduction in motor tics and vocal tics in both participants. There was no decrease in efficacy over the 3 years the 18yo had been smoking. The beneficial effects lasted for at least 3-4 hr up to 1 day. None of the patients suffered from a psychotic disorder.	Suggests marijuana use may reduce both motor and vocal tics among individuals with TS.	Retrospective study - both cases used marijuana.	18yo: none; 16yo: neuroleptics	No	Both patients did not report any serious side-effects when smoking marijuana.	No severe side effects reported.
*When country of recruitment was not specifically mentioned within the paper, the location was taken from other information within the paper (e.g., authors affiliation, ethics committee). CBD= cannabidiol; CE= Cannabis sativa extract; PEA= palmitoylethanolamide. QoL = Quality of Life

## Sheet: Table S2 - Case Reports
Table S2. JBI Critical Appraisal Checklist for Case Reports
Condition	Author	Patient demographic characteristics clearly described	Patient history clearly described	Current clinical condition clearly described	Diagnostic tests/assessment methods clearly described	Intervention (s) or treatment procedure clearly described	Post-intervention clinical condition clearly described	Adverse events clearly described	Were there takeaway lessons	Conflict of interest declared
ASD	Kurz & Blaas	Y	N	Y	Y	Y	Y	Y	Y	U
ASD	Ponton et al.	Y	Y	Y	Y	Y	Y	Y	Y	N
FXS	Tartaglia	Y	Y	Y	Y	Y	Y	Y	Y	Y
Mood disorders	Gruber et al.	Y	N	Y	N	N	N	N	N	U
Mood disorders	Laczkovic et al.	Y	N	Y	Y	Y	Y	Y	Y	N
Anxiety disorders	Klier et al.	Y	Y	Y	Y	U	Y	N	Y	N
PTSD	Bolsoni et al.	Y	N	Y	Y	Y	Y	N	Y	N
PTSD	Lorenz	Y	N	N	N	N	N	Y	Y	U
PTSD	Shannon et al	Y	Y	Y	Y	Y	Y	Y	Y	N
TS	Hasan et al	Y	Y	Y	Y	Y	Y	Y	Y	N
TS	Jakubovski & Muller-Vahl	Y	Y	Y	N	Y	Y	Y	Y	N
Y=yes, N=no, U=unclear, NA=not applicable.

## Sheet: Table S3 - Case Series
Table S3. NIH Quality Assessment Tool for case series
Condition	Author	Study question clearly stated	Study population clearly and fully described	Cases consecutive	Participants comparable	Intervention clearly described	Outcome measures*	Length of follow-up adequate	Statistical methods well-described	Results well-described	Conflict of interest	Column2
FASD	Koren et al.	Y	Y	U	Y	U	N	N	N	N	N
TS	Muller-Vahl et al	Y	Y	Y	Y	N	N	N	N	N	U
Y=yes, N=no, U=unclear, NA=not applicable.
Outcome Measures = Outcome measures prespecified, clearly defined, valid, reliable, and assessed consistently

## Sheet: Table S4 - Before-After Studies
Table S4. NIH Quality Assessment Tool for Before-After (Pre-Post) Studies with No Control Group
Condition	Author	Study question*	Eligibility criteria*	Participant Represent*	Eligible participants*	Sample size*	Intervention*	Outcome measures*	Assessors*	Loss to follow-up*	Before/after intervention*	Interrupted time-series design*	Group level*	Conflict of interest
ASD	Aran	Y	Y	Y	Y	U	Y	U	N	N	N	N	NA	N
ASD	Bar-Lev Schleider	Y	Y	Y	Y	U	Y	U	N	N	Y	N	NA	Y
ASD	Fleury-Teixeira et al.	Y	Y	Y	Y	U	Y	U	N	N	N	N	NA	Y
Fragile X	Heussler et al.	Y	Y	Y	Y	U	Y	Y	N	Y	Y	N	NA	Y
Y=yes, N=no, U=unclear, NA=not applicable
Study question = Study question clearly stated; Eligibility criteria = Eligibility criteria prespecified and clearly described; Participants Represent = The participants in the study representative of clinical population; Eligible participants = All eligible participants enrolled; Sample size = The sample size sufficiently large to provide confidence in the findings; Intervention = Intervention c…

## Sheet: Table S5 - Randomised Trials
Table S5. Risk of Bias for Randomised Trial (ROB2)
Condition	Author	Risk of bias arising from the randomisation process	Risk of bias due to deviations from intended interventions (effect of assignment)	Risk of bias due to deviations from intended interventions	Risk of bias in selection of the reported results	Overall risk of bias	Conflict of interest
ID	Efron et al.	Low	Low	Low	Low	Low	No

## Sheet: Table S6 - Clinical Trials
Table S6. Clinical trials in progress for studies of cannabinoid-based products (CBP) in the treatment of psychiatric and neurodevelopmental disorders in children and adolescents*
Condition	ID	Country	Primary Sponsor (Sponsor) & Principal Investigator (PI)	Aim	Study Design	Target Sample Size	Participants	Drug	Duration and Dose	Outcome
Anxiety Disorders	ACTRN12617000825358	Australia	Sponsor: Orygen, The National Centre for Excellence in Youth Mental Health PI: Prof G. Paul Amminger	To assess the safety, tolerability and efficacy of cannabidiol for anxiety disorders.	Phase 2, 12-week open-label pilot study	30 (Final 31)	Males and females aged 12-25 years old (inclusive), with a diagnosis of a DSM-5 anxiety disorder.	CBD; 200mg oral capsules.	CBD will be administered on a fixed–flexible schedule over 12 weeks; beginning with 200mg/day and adjusted up to 800mg/day by week 8.	Active, not recruiting
ASD	ACTRN12621000760875; FNX001/21	Australia	Sponsor: Fenix Innovation Group PI: A/Prof Michael Fahey	To evaluate the safety and efficacy of full-spectrum medicinal cannabis plant extract containing only 0.08% THC (FEN164) is in children and adolescents with ASD.	Phase 1 /Phase 2, 20-week, open-label study	20	Males and females aged 5-17 years old, with a diagnosis of level 2 ASD according to DSM-5 (confirmed by ADOS-2 criteria).	Full-spectrum medicinal cannabis plant extract with 0.08% THC (FEN164 - oil administered orally).	20-week study, including 8 week treatment period. Weight-based dosing. Initial daily dose of 5mg/kg. Slowly increased to the treatment dose of 20mg/kg per day. At the end of the 8-week treatment period, the dosage will reduce in 5mg/kg/week increments until the treatment stops.	Not yet recruiting
ASD	ACTRN12621000370808; ZTL-105	Australia	Sponsor: Zelira Therapeutics Ltd PI: Dr Alistair Vickery	To investigate the tolerance and response to two low dose medicinal cannabis products with different THC:CBD ratios in ASD patients.	Open label, observational study	150	Males and females aged ≥6 years old (no max age limit), with a documented history of ASD (including diagnosis and severity of ASD) with behavioural symptoms that receive medicinal cannabis (HOPE 1TM / HOPE 2TM) as prescribed per standard practice.	HOPE 1TM and/or HOPE 2TM products (oral oil formulations) as part of their standard of care treatment.	Administered twice daily at a dosage recommended by the study doctor as per their standard of care practice. Each patient will be observed for a period of 6-months from their first visit.	Not yet recruiting
ASD	NCT04745026; GWND19189; 2020-002819-21	USA	Sponsor: GW Research Ltd PI: Unknown	To evaluate the safety and efficacy of GWP42003-P (Cannabidiol Oral Solution), in reducing symptom severity in children with ASD.	Phase 2 exploratory, randomized, double-blind, placebo-controlled trial	160	Males and females aged 6-17 years old with a DSM-5 diagnosis of ASD.	CBD; GWP42003-P oral solution (100mg/mL CBD in sesame oil with flavouring).	Participants would randomly be assigned to receive placebo or CBD for 12 weeks. Intervention group will receive 5mg/kg/day GWP42003-P for 1 week and then 10 mg/kg/day GWP42003-P for 11 weeks. Administered twice a day (morning and evening).	Recruiting
ASD	NCT03900923; 18-00250	USA	Sponsor: NYU Langone Health PI: Francisco Castellanos, MD	To identify the optimal dosing of CBD in children and adolescents with ASD and to identify primary and secondary outcomes for future controlled studies.	Phase 2, 6-week open label trial	30	Male and female outpatients aged 7-17 years old, with ASD (confirmed by the ADOS-2 and DSM-5).	98% pure CBD. The CBD (Epidiolex) will be 100mg/mL oral solution provided by Greenwich Biosciences, Inc.	A Bayesian optimal interval (BOIN) design. Participants will be assigned to one of three doses of 3, 6, or 9 mg/kg/day, depending on the treatment response of participants in prior cohorts for 6-weeks.	Recruiting
ASD	NCT03202303; 2017-8538; AR160104; G32379	USA	Secondary Sponsor: GW Pharmaceuticals Ltd.; United States Department of Defense PI: Eric Hollander	To study the efficacy and safety of cannabidivarin (CBDV) in children with ASD.	Phase 2, 12-week double-blind, randomized, placebo-controlled trial	100	Male and female paediatric outpatients aged 5-18 years old, diagnosed with ASD (confirmed by ADOS and DSM-5).	Cannabidivarin (<0.01%THC).	Participants will be randomly assigned to either placebo or 10 mg/kg/day of CBDV for 12 weeks.	Recruiting
ASD	NCT04517799; 181455	USA	Sponsor: University of California, San Diego PI: Doris Trauner, MD	To determine whether CBD can treat severe behaviour problems in children with ASD.	Phase 2/Phase 3, double-blind, randomised, crossover trial	30	Males aged 7-14 years old with a confirmed diagnosis of ASD (based on ADOS testing) - with autism severity assessed as severe with substantial behavioural problems.	CBD (EPIDIOLEX). An oral purified CBD solution (formulation is a 100 mg/mL solution).	Participants will be randomly assigned to either receive placebo or CBD for 8-weeks. After a 4-week washout period, the treatment will be reversed. Weight-based dosing. CBD will be titrated over time from week 1 (5mg/kg/day; divided into 2 doses), to week 3-8 (20mg/kg/day; divided into 2 doses).	Recruiting
ASD	NCT04520685; 19-2168	USA	Sponsor: University of Colorado, Denver PI: Nicole R Tartaglia, MD	To investigate the efficacy and safety of CBD in children and adolescents with ASD.	Double blind, randomized, three-arm, placebo-controlled study	70	Males and females aged 5-17 years old (inclusive) at time of screening. With a previous documented diagnosis of ASD by a medical or psychological professional.	Oral CBD 100mg/mL.	12-week study period. The titration dose will be 5mg/kg/day. The treatment dose will be 10mg/kg/day. Participants will be randomly assigned to one of three conditions. Group A: receive CBD for the first 12 weeks and placebo for the last 15 weeks. Group B: receive placebo for the first 15 weeks and CBD for the last 12 weeks. Group C: receive CBD throughout the entire 27 weeks of treatment.	Recruiting
FXS	ACTRN12618001868279; NCT03802799; ZYN2-CL-017	Australia, USA & NZ	Sponsor: Zynerba Pharmaceuticals Pty. Ltd PI: Dr Helen Heussler	To assess the long-term safety and tolerability of ZYN002 (administered as a transdermal gel) to children and adolescents with FXS.	Phase 2 & 3, open label multiple-center extension trial	300	Males and females aged 3-18 years old, diagnosed with FXS who participated in the ZYN2-CL-016 study.	ZYN002 - CBD transdermal gel.	52-week treatment period. Applied by parents/ caregivers twice daily. Weight-based dosing: a) ≤35kg will receive 2 sachets of the gel/day (1 sachet every 12 hours); b) >35kg will receive 4 sachets of gel/day (2 sachets every 12 hours). Investigators may decrease or increase the dose to a total of 2 or 4 sachets of the gel/day any time after the first month of treatment.	Recruiting/ Enrolling by invitation
FXS	ACTRN12621000874819; NCT04977986; ZYN2-CL-033	Australia, USA, UK, Ireland	Sponsor: Zynerba Pharmaceuticals, Inc. PI: Dr Helen Heussler	To evaluate the efficacy and safety of ZYN002 administered to children and adolescents with FXS.	Phase 3, randomized, double-blind, placebo-controlled, multiple-center study	204	Males and females aged 3 to <18 years old with FXS.	ZYN002 - CBD transdermal gel.	18-week treatment period, where participants will be randomly assigned to receive placebo or CBD gel. Gel applied by parents/ caregivers twice daily. Weight-based dosing: a) ≤30kg will receive 2 sachets of the gel/day (1 sachet every 12 hours); b) 30-50kg will receive 4 sachets of gel/day (2 sachets every 12 hours); c) >50kg will receive 6 sachets of gel/day (3 sachets every 12 hours).	Recruiting
ID	NCT04821856; RCH HREC 70053	Australia	Sponsor: Murdoch Children’s Research Institute PI: Daryl Efron	To evaluate the efficacy of oral purified cannabidiol isolate in reducing severe behavioural problems among children and adolescents with ID.	Phase 2, multi-site, double-blind, parallel group, randomized, placebo-controlled study	140	Males and females 6-18 years old with DSM-5 diagnosis of ID (with behaviour problems).	CBD Oil; CBD isolate 100mg/mL in MCT oil oral solution (manufactured by THC Pharma).	10-week study period (including 1 week up titration phase and 1 week down titration phase), where participants will randomly be assigned to receive placebo or CBD. Up titration phase (week 1) and down titration phase (week 10): 5mg/kg/day twice a day in doses of 2.5mg/kg. Those weighing ≥100kg will receive a dose of 500mg/day. Maintenance phase (week 2-9): dose increased to 10 mg/kg/day in two da…	Recruiting
Mood Disorders	ACTRN12616001001482	Australia	Sponsor: University of New South Wales PI: Prof Jan Copeland	To examine the safety and efficacy of cannabidiol (CBD) in the management of mood disorders in adolescent and young adult males with concurrent cannabis use.	Phase 2, double blind, randomised placebo-controlled trial	20	Males aged 6-26 years old at presentation, who use cannabis on average 3 days per week (over last 30 days).	CBD capsules (100mg. Synthetic; 99.6% CBD powder dissolved in corn oil encapsulated in gelatine).	12-week treatment period in which participants will randomly be assigned to receive placebo or CBD capsules. Intervention group receive 400mg (i.e., 4 capsules) of CBD twice a day (morning and night) taken 12 hours apart.	Recruiting
Psychosis	ACTRN12621000349842	Australia	Sponsor: Orygen PI: Prof Paul Amminger	To assess the effect of Cannabidiol on positive psychotic symptoms among youth and young adults who have been identified as Ultra-High Risk of Psychosis.	Phase 3, a randomised, three-arm, double-blind controlled trial	405	Males and females aged 12-25 years old (inclusive) at entry and meet one or more Ultra-High Risk for psychosis groups.	CBD capsules (200mg).	12-week study period, in which participants are randomised into a placebo or one of two treatment groups. Two treatment groups – dose of 600mg or 1000mg per day (fixed schedule). All receive 2 capsules in the morning, and 3 in the evening (The 600mg group will receive 1 placebo capsule in the morning and 1 placebo capsule in the evening).	Not yet recruiting
Psychosis	NCT04411225; 649467 CMCR Grants Program	USA	Sponsor: University of California, San Diego PI: Kristin Cadenhead	To examine CBD as an augmentation strategy in early psychosis (including exploring the moderator and mediator effects of CBD).	Phase 3, outpatient, single center, between-group, double blind, placebo-controlled design	120	Males and females aged 16-30 years old, with first episode of psychosis (onset within the last 2 years) or attenuated psychosis syndrome (APS) stabilized with treatment for at least 8 weeks prior to initiating the trial.	CBD oral solution (100 mg/mL).	8-week study period, in which participants are randomly assigned to receive their treatment augmented with CBD oral solution or with a placebo. CBD oil administered at 500mg at bedtime for 1 week, then 500mg twice a day.	Recruiting
* Clinical Trials in progress as on 26 August 2021

## Sheet: References
References
Aran, A., Cassuto, H., Lubotzky, A., Wattad, N., & Hazan, E. (2019). Brief Report: Cannabidiol-Rich Cannabis in Children with Autism Spectrum Disorder and Severe Behavioral Problems-A Retrospective Feasibility Study. Journal of Autism and Developmental Disorders, 49(3), 1284-1288.
Bar-Lev Schleider, L., Mechoulam, R., Saban, N., Meiri, G., & Novack, V. (2019). Real life Experience of Medical Cannabis Treatment in Autism: Analysis of Safety and Efficacy. Scientific reports, 9(1), 200. doi:10.1038/s41598-018-37570-y
Bolsoni, L. M., da Silva, T. D. A., Quintana, S. M., de Castro, M., Crippa, J. A., & Zuardi, A. W. (2019). Changes in Cortisol Awakening Response Before and After Development of Posttraumatic Stress Disorder, Which Cannot be Avoided with Use of Cannabidiol: A Case Report. The Permanente journal, 23(no pagination).
Efron, D., Freeman, J., Cranswick, N., Payne, J., Mulraney, M., Prakash, C., . . . Williams, K. (2020). A Pilot Randomized Controlled Trial of Cannabidiol to Reduce Severe Behavioral Problems in Children and Adolescents With Intellectual Disability. British Pharmacological Society, 2020, 1-11. doi:DOI: 10.1111/bcp.14399
Fleury-Teixeira, P., Caixeta, F. V., da Silva, L. C. R., Brasil-Neto, J. P., & Malcher-Lopes, R. (2019). Effects of cbd-enriched cannabis sativa extract on autism spectrum disorder symptoms: An observational study of 18 participants undergoing compassionate use. Frontiers in Neurology, 10 (OCT) (no pagination)(1145).
Gruber, A. J., Pope, H. G., Jr., & Brown, M. E. (1996). Do patients use marijuana as an antidepressant? Depression, 4(2), 77-80. doi:https://doi.org/10.1002/(SICI)1522-7162(1996)4:2<77::AID-DEPR7>3.0.CO;2-C
Hasan, A., Rothenberger, A., Munchau, A., Wobrock, T., Falkai, P., & Roessner, V. (2010). Oral DELTA9-tetrahydrocannabinol improved refractory Gilles de la Tourette syndrome in an adolescent by increasing intracortical inhibition: A case report. Journal of Clinical Psychopharmacology, 30(2), 190-192.
Heussler, H., Cohen, J., Silove, N., Tich, N., Bonn-Miller, M. O., Du, W., . . . Sebree, T. (2019). A phase 1/2, open-label assessment of the safety, tolerability, and efficacy of transdermal cannabidiol (ZYN002) for the treatment of pediatric fragile X syndrome. Journal of Neurodevelopmental Disorders, 11 (1 (no pagination)), 16.
Jakubovski, E., & Muller-Vahl, K. (2017). Speechlessness in Gilles de la Tourette Syndrome: Cannabis-based medicines improve severe vocal blocking tics in two patients. International Journal of Molecular Sciences, 18(8 (no pagination)), 1739.
Klier, C. M., de Gier, C., Felnhofer, A., Laczkovics, C., & Amminger, P. G. (2020). A Case Report of Cannabidiol Treatment of a Crohn's Disease Patient With Anxiety Disorder. Journal of Clinical Psychopharmacology, 40(1), 90-92. doi:10.1097/JCP.0000000000001152
Koren, G., Cohen, R., & Sachs, O. (2021). Use of cannabis in fetal alcohol spectrum disorder. Cannabis and cannabinoid research, 6(1), 74–76. doi:DOI: 10.1089/can.2019.0056
Kurz, R., & Blaas, K. (2010). Use of dronabinol (delta-9-THC) in autism: a prospective single-case-study with an early infantile autistic child. Cannabinoids, 5(4), 4-6.
Laczkovics, C., Kothgassner, O. D., Felnhofer, A., & Klier, C. M. (2021). Cannabidiol treatment in an adolescent with multiple substance abuse, social anxiety and depression. Neuropsychiatrie, 35(1), 31-34. doi:10.1007/s40211-020-00334-0
Lorenz, R. (2004). On the application of cannabis in paediatrics and epileptology. Neuroendocrinology letters, 25, 40-44.
Müller-Vahl, K. R., Kolbe, H., Schneider, U., & Emrich, H. M. (1998). Cannabinoids: possible role in patho-physiology and therapy of Gilles de la Tourette syndrome. Acta psychiatrica Scandinavica, 98(6), 502-506. doi:10.1111/j.1600-0447.1998.tb10127.x
Ponton, J. A., Smyth, K., Soumbasis, E., Llanos, S. A., Lewis, M., Meerholz, W. A., & Tanguay, R. L. (2020). A pediatric patient with autism spectrum disorder and epilepsy using cannabinoid extracts as complementary therapy: a case report. Journal of medical case reports, 14(1), 162-162. doi:10.1186/s13256-020-02478-7
Shannon, S., & Opila-Lehman, J. (2016). Effectiveness of Cannabidiol Oil for Pediatric Anxiety and Insomnia as Part of Posttraumatic Stress Disorder: A Case Report. Permanente Journal, 20(4), 16-005.
Tartaglia, N., Bonn-Miller, M., & Hagerman, R. (2019). Treatment of Fragile X Syndrome with Cannabidiol: A Case Series Study and Brief Review of the Literature. Cannabis and cannabinoid research, 4(1), 3-9.
